# 1 **A suberized exodermis is required for tomato drought tolerance**

2

3 Alex Cantó-Pastor<sup>1</sup>, Kaisa Kajala<sup>1,2</sup>, Lidor Shaar-Moshe<sup>1</sup>, Concepción Manzano<sup>1</sup>, Prakash  
4 Timilsena<sup>3</sup>, Damien De Bellis<sup>4,7</sup>, Sharon Gray<sup>1†</sup>, Julia Holbein<sup>5</sup>, He Yang<sup>1</sup>, Sana Mohammad<sup>1</sup>,  
5 Niba Nirmal<sup>1</sup>, Kiran Suresh<sup>5</sup>, Robertas Ursache<sup>4</sup>, G. Alex Mason<sup>1</sup>, Mona Gouran<sup>1</sup>, Donnelly A.  
6 West<sup>9</sup>, Alexander T. Borowsky<sup>6</sup>, Kenneth A. Shackel<sup>8</sup>, Neelima Sinha<sup>9</sup>, Julia Bailey-Serres<sup>6</sup>, Niko  
7 Geldner<sup>4</sup>, Song Li<sup>3</sup>, Rochus Benni Franke<sup>5</sup>, Siobhan M. Brady<sup>1</sup>.

8

9 <sup>1</sup>Department of Plant Biology and Genome Center, University of California, Davis, Davis CA 95616, USA.

10 <sup>2</sup>Plant-Environment Signaling, Institute of Environmental Biology, Utrecht University, 3584 Utrecht, the Netherlands

11 <sup>3</sup>School of Plant and Environmental Sciences, Virginia Tech, Blacksburg, VA 24061, USA.

12 <sup>4</sup>Department of Plant Molecular Biology, University of Lausanne, 1015 Lausanne, Switzerland.

13 <sup>5</sup>Institute of Cellular and Molecular Botany, Rheinische Friedrich-Wilhelms-University of Bonn, Kirschallee 1, 53115  
14 Bonn, Germany.

15 <sup>6</sup>Center for Plant Cell Biology, Department of Botany and Plant Sciences, University of California, Riverside, Riverside,  
16 CA 92521, USA.

17 <sup>7</sup>Electron Microscopy Facility, University of Lausanne, 1015 Lausanne, Switzerland.

18 <sup>8</sup>Department of Plant Sciences, University of California, Davis, Davis CA 95616, USA.

19 <sup>9</sup>Department of Plant Biology, University of California, Davis, Davis CA 95616, USA.

20 <sup>†</sup>Deceased

21

## 22 **SUMMARY**

23 Plant roots integrate environmental signals and developmental programs using exquisite  
24 spatiotemporal control. This is apparent in the deposition of suberin, an apoplastic diffusion  
25 barrier, which regulates the entry and exit of water, solutes and gases, and is environmentally  
26 plastic. Suberin is considered a hallmark of endodermal differentiation, but we find that it is absent  
27 in the tomato endodermis during normal development. Instead, suberin is present in the  
28 exodermis, a cell type that is absent in the model organism *Arabidopsis thaliana*. Here, we  
29 uncover genes driving exodermal suberization and describe its effects on drought responses in  
30 tomato, unravelling the similarities and differences with the paradigmatic *Arabidopsis* endodermis.  
31 Cellular resolution imaging, gene expression, and mutant analyses reveal loss of this program  
32 from the endodermis, and its co-option in the exodermis. Functional genetic analyses of the  
33 tomato MYB92 transcription factor and ASFT enzyme demonstrate the importance of exodermal  
34 suberin for a plant water-deficit response. Controlling the degree of exodermal suberization could  
35 be a new strategy for breeding climate-resilient plants.

36

## 37 INTRODUCTION

38 Plants have evolved complex cell type-specific regulatory processes to respond and adapt to  
39 dynamic environments. In certain cell types, such processes allow the formation of constitutive  
40 and inducible apoplastic diffusion barriers that regulate mineral, nutrient, and water transport,  
41 pathogen entry, and have the capacity to alleviate water-deficit stress (Baxter et al., 2009;  
42 Thomas et al., 2007). The *Arabidopsis thaliana* root endodermis contains both lignified and  
43 suberized diffusion barriers, of which the latter is extremely responsive to nutrient deficiency  
44 (Barberon et al., 2016). Many of the molecular players associated with suberin biosynthesis and  
45 the transcriptional regulation of this biosynthetic process have been elucidated using the  
46 *Arabidopsis* root endodermis as a model.

47 Suberin is a complex hydrophobic biopolymer, composed of a phenylpropanoid-derived  
48 aromatic (primarily ferulic acid) and aliphatic (poly-acylglycerol) constituents which is deposited  
49 between the primary cell wall and the plasma membrane as a lamellar structure (Molina et al.,  
50 2009; Serra and Geldner, 2022). While the order of the enzymatic reactions that produce suberin  
51 is not entirely understood (Serra and Geldner, 2022), many of the enzymes associated with  
52 suberin biosynthesis have been identified to function in the *Arabidopsis* root endodermis. These  
53 include the elongation of fatty acid acyl-CoA thioesters to very long chain fatty acid-CoA products  
54 by a fatty acid elongase complex for which the KCS (ketoacyl-CoA synthase) enzyme DAISY  
55 (docosanoic acid synthase) is the rate limiting step (Franke et al., 2009). Suberin primary alcohols  
56 are formed by the FAR enzymes (fatty acyl reductases) which reduce C18:0-C22:0 fatty acids to  
57 primary fatty alcohols (Domergue et al., 2010). Suberin  $\omega$ -hydroxyacids ( $\omega$ -OH acids) and  $\alpha,\omega$ -  
58 dicarboxylic acids are produced by cytochrome P450 monooxygenases from the subfamilies  
59 CYP86A, CYP86B and CYP94B which  $\omega$ -hydroxylate fatty acids (Compagnon et al., 2009; Höfer  
60 et al., 2008; Molina et al., 2009). Glycerol esterification of fatty acid acyl CoA derivatives is  
61 catalyzed by the glycerol phosphate acyltransferases (GPAT) including GPAT5 (Beisson et al.,  
62 2007). Ferulic acid is esterified to  $\omega$ -hydroxyacids and primary alcohols by the feruloyl transferase  
63 ALIPHATIC SUBERIN FERULOYL TRANSFERASE (ASFT)/ $\omega$ -HYDROXYACID/FATTY  
64 ALCOHOL HYDROXY-CINNAMOYL TRANSFERASE (FHT) (Gou et al., 2009; Molina et al.,  
65 2009; Serra et al., 2010).

66 Many of the suberin biosynthetic enzymes were identified based on their co-expression,  
67 leading to the hypothesis that a simple transcriptional module coordinates their transcription  
68 (Compagnon et al., 2009; Molina et al., 2009; Shukla et al., 2021). Although the overexpression  
69 of several transcription factors can drive suberin biosynthesis in either *Arabidopsis* leaves or roots  
70 (Cohen et al., 2020; Kosma et al., 2014), the transcription of suberin biosynthetic genes is

71 redundantly determined. It is only when a set of four Arabidopsis transcription factors are mutated  
72 - *MYB41*, *MYB53*, *MYB92* and *MYB93* - that suberin is largely absent from the Arabidopsis root  
73 (Shukla et al., 2021). Although not studied in roots, the Arabidopsis *MYB107* and *MYB9*  
74 transcription factors are required for suberin biosynthetic gene expression and suberin deposition  
75 in seeds (Gou et al., 2017; Lashbrooke et al., 2016). These data demonstrate that, in Arabidopsis,  
76 multiple transcription factors coordinate the expression of suberin biosynthesis genes, dependent  
77 on the organ. Furthermore, these transcriptional regulatory modules are likely conserved across  
78 plant species, as orthologs of many of these transcription factors and their target genes are  
79 strongly co-expressed across multiple angiosperms (Lashbrooke et al., 2016; Molina et al., 2009).

80 While the Arabidopsis root endodermis is well characterized anatomically and molecularly,  
81 an additional root cell type deposits an apoplastic diffusion barrier during primary growth in other  
82 species (Enstone et al. 2002). This cell layer is found below the epidermis, it is the outermost  
83 cortical cell layer of the root and has been referred to as either the hypodermis or the exodermis.  
84 The latter term was used given observations of a potential Casparian Strip. Indeed, in 93% of  
85 angiosperms studied this layer was reported to possess either a lignified Casparian Strip, a  
86 suberized diffusion barrier or both (Perumalla et al., 1990). Given the nature of these features,  
87 the exodermis is hypothesized to function similarly to the endodermis (Barberon, 2017; Geldner,  
88 2013). The *Solanum lycopersicum* (tomato) root contains both an exodermis and an endodermis.  
89 At its first stage of differentiation, a lignified cap is deposited on the outmost (epidermal) face of  
90 exodermal cell walls as well as on its anticlinal walls. During its second stage of differentiation,  
91 suberin is deposited around the entire surface of the exodermal cells (Kajala et al., 2021).  
92 Strikingly, the tomato root endodermis did not contain suberin under the conditions examined.  
93 The transcriptional regulators and biosynthetic enzymes associated with this aspect of exodermal  
94 differentiation are not known, nor is the influence of root exodermal suberization on environmental  
95 stress responses.

96 Here, we profiled the transcriptional landscape of the tomato exodermis at cellular  
97 resolution, characterized suberin accumulation in response to plant hormone abscisic acid (ABA)  
98 and in response to water-deficit. We identified a co-expression module of potential suberin-related  
99 genes, including transcriptional regulators, and validated these candidates by generating multiple  
100 CRISPR-Cas9 mutated tomato hairy root lines using *Rhizobium rhizogenes* (Ron et al., 2014)  
101 and tomato plants stably transformed with *Agrobacterium tumefaciens*, and screened them for  
102 suberin phenotypes using histochemical techniques. The validated genes included a MYB  
103 transcription factor (*SIMYB92*, *Solyc05g051550*) whose mutant has a reduction in exodermal  
104 suberin and the *SIASFT* enzyme, whose mutant has a disrupted exodermis suberin lamellar

105 structure with a concomitant reduction in root suberin levels. To test the hypothesis that suberin  
106 is associated with tomato's drought response, we exposed *slmyb92* and *slasft* mutant lines to  
107 water deficit conditions. Both mutants displayed a disrupted response including perturbed stem  
108 water potential and leaf water status. This work describes for the first time a genetic mechanism  
109 required for exodermal suberin biosynthesis content and integrity, and link these to a plant's  
110 response to reduced water availability.

111

## 112 **RESULTS**

### 113 **Developmental timing and chemical composition of the tomato suberized exodermis**

114 We previously quantified exodermis suberin deposition along the longitudinal axis of the tomato  
115 root (cv. M82, LA3475), using the histochemical stain Fluorol Yellow (FY) In Arabidopsis roots,  
116 suberin is absent from the root meristem and elongation zones and begins to be deposited in a  
117 patchy manner in the late differentiation zone after the CS has become established, and is then  
118 followed by complete suberization in the distal differentiation zone. Quantification of exodermal  
119 suberin in seven day old roots demonstrated the same three categories of deposition (none,  
120 patchy and complete) (**Figure 1A,C,D; Supplemental Figure 1**). Electron microscopy further  
121 demonstrated that within the completely suberized zone, suberin lamellae are deposited primarily  
122 on the epidermal and inter-exodermal faces of the exodermal cell (**Figure 1B; Supplemental**  
123 **Figure 1**). Suberin was consistently absent within the root endodermis throughout all  
124 developmental zones (**Figure 1A, Supplemental Figure 1**) (Kajala et al., 2021).

125 Monomer profiling of cell wall-associated, and polymer-linked aliphatic suberin monomers  
126 in one-month-old tomato roots revealed a predominance of  $\alpha,\omega$ -dicarboxylic acids, similar to  
127 potato (Serra et al. 2010). Compared to Arabidopsis roots, which mostly features  $\omega$ -OH acids and  
128 a maximum chain length of 24 carbons (C24) (Franke et al., 2005, 2009), additional C26 and C28  
129  $\omega$ -OH acids and primary alcohols were observed in tomato (**Supplementary Figure 2A**). This  
130 phenomenon of inter-specific variation in suberin composition has been previously observed  
131 (Kolattukudy et al., 1975). Nevertheless, tomato suberin composition greatly overlaps with  
132 Arabidopsis, which should facilitate the identification of orthologous suberin biosynthesis genes.

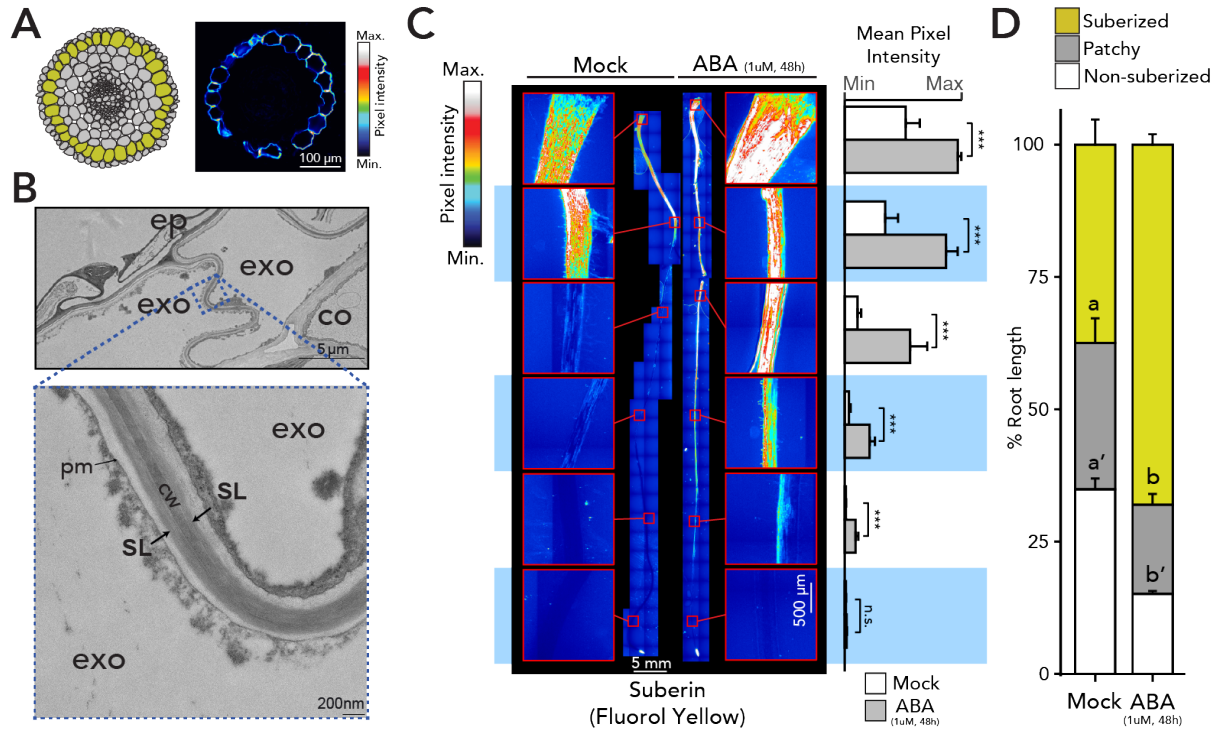

133  
 134 **Figure 1: Suberin is deposited in the tomato exodermis and is regulated by ABA.** (A) Graphical representation of  
 135 *S. lycopersicum* (cv. M82) root anatomy (the exodermis is highlighted in yellow) and representative cross section of a  
 136 7-day-old root stained with fluorol yellow (FY). Scale bar = 100  $\mu$ M. (B) Transmission electron microscopy cross-  
 137 sections of 7-day-old roots obtained at 1 mm from the root-hypocotyl junction. Top image shows the epidermal (ep),  
 138 exodermal (exo) and inner cortex (co) layers. Bottom image is a close-up of the featured region (zone defined with blue  
 139 dashed lines), showing the presence of suberin lamellae (SL). cw = cell wall, pm = plasma membrane. (C) Fluorol  
 140 yellow staining for suberin in wild-type 7-day-old plants treated with mock or 1  $\mu$ M ABA for 48 h. Whole-mount staining  
 141 of primary root (left) and quantification of suberin abundance along the root (right),  $n \geq 6$ , error bars: SD. \*\*\* =  $p$ -value  
 142  $< 0.005$ . One-way ANOVA followed by TukeyHSD. (D) Developmental stages of suberin deposition of wild-type plants  
 143 treated with mock or 1  $\mu$ M ABA for 48 h. Zones were classified as non-suberized (white), patchy suberized (gray) and  
 144 continuously suberized (yellow),  $n \geq 6$ , error bars: SD.

145

## 146 Identification of suberin biosynthetic enzymes and transcriptional regulators

147 In order to map the tomato root suberin biosynthetic pathway and its transcriptional  
 148 regulators, we leveraged prior observations of relative conservation of transcriptional co-  
 149 regulation of suberin pathway across angiosperms (Lashbrooke et al. 2016; Molina et al. 2009;  
 150 Compagnon et al. 2009; Legay et al. 2016). In the *Arabidopsis* root, suberin levels increase upon  
 151 treatment with ABA (Barberon et al., 2016; Shukla et al., 2021), a hormone which is a first  
 152 responder upon water deficit stress. Exodermal suberin deposition in tomato is similarly increased  
 153 upon ABA treatment, both in terms of the region that is completely suberized as well as in the  
 154 intensity of the signal (**Figure 1C-D**). *S. lycopersicum*'s wild relative, *Solanum pennellii* (LA0716)

155 is drought tolerant (Eshed et al., 1992; Gong et al., 2010; Gur et al., 2011), and enhanced suberin  
156 deposition in *Arabidopsis* via mutation of *ENHANCED SUBERIN1 (ESB1)* confers drought  
157 tolerance, although *esb1* also shows enhanced endodermal lignin and interrupted CS formation  
158 (Baxter et al., 2009). Hence, we tested and confirmed the hypotheses that *S. pennellii* has higher  
159 suberin deposition than M82 even in water sufficient conditions and shows no changes in suberin  
160 deposition pattern in response to ABA in *S. pennellii* seedlings (**Supplementary Figures 2-3**). *S.*  
161 *pennellii* suberin levels are thus constitutive. Therefore, we utilized a gene expression dataset  
162 profiling transcription in M82 roots as well as across roots from 76 tomato introgression lines (ILs)  
163 derived from *S. lycopersicum* cv. M82 and *S. pennellii* (LA0716) with M82 as the recurrent parent  
164 (Toal et al., 2018). We additionally profiled the root transcriptomes of one-month-old tomato plants  
165 under well-watered, waterlogged and water-deficit conditions. We hypothesized that genes  
166 directly involved in the biosynthesis and deposition of suberin will be highly correlated in both  
167 water deficit and the IL population.

168 By combining both IL, waterlogging, and water deficit datasets in a weighted gene  
169 correlation network analysis (WGCNA) (Langfelder and Horvath, 2008), we identified modules of  
170 co-expressed genes (**Supplementary Figure 4**). A module (“royalblue”) containing 180 genes  
171 was significantly enriched in suberin-related genes (odds ratio = 16.1;  $p < 0.001$ ). This was  
172 confirmed by intersection with the dataset profiling expression in a known activator of tomato fruit  
173 suberin biosynthesis (**Supplemental Table 1**) (Lashbrooke et al., 2016). The “royalblue” module  
174 contains several orthologs of well-known suberin biosynthetic gene families such as glycerol-3-  
175 phosphate acyltransferases (GPATs), 3-ketoacyl-CoA synthases (KCSs), and feruloyl  
176 transferases (ASFT/FHTs) (**Figure 2A, Supplemental Table 1**). Additionally, putative tomato  
177 orthologs of known transcriptional regulators of suberin biosynthesis, *AtMYB41*, *AtMYB63* and  
178 *AtMYB92* (*SIMYB41*: *Solyc02g079280*; *SIMYB63*: *Solyc10g005550*; *SIMYB92*:  
179 *Solyc05g051550*), among others, were found in this module (Kosma et al. 2014; Shukla et al.  
180 2021; Cohen et al. 2020; Du et al. 2015).

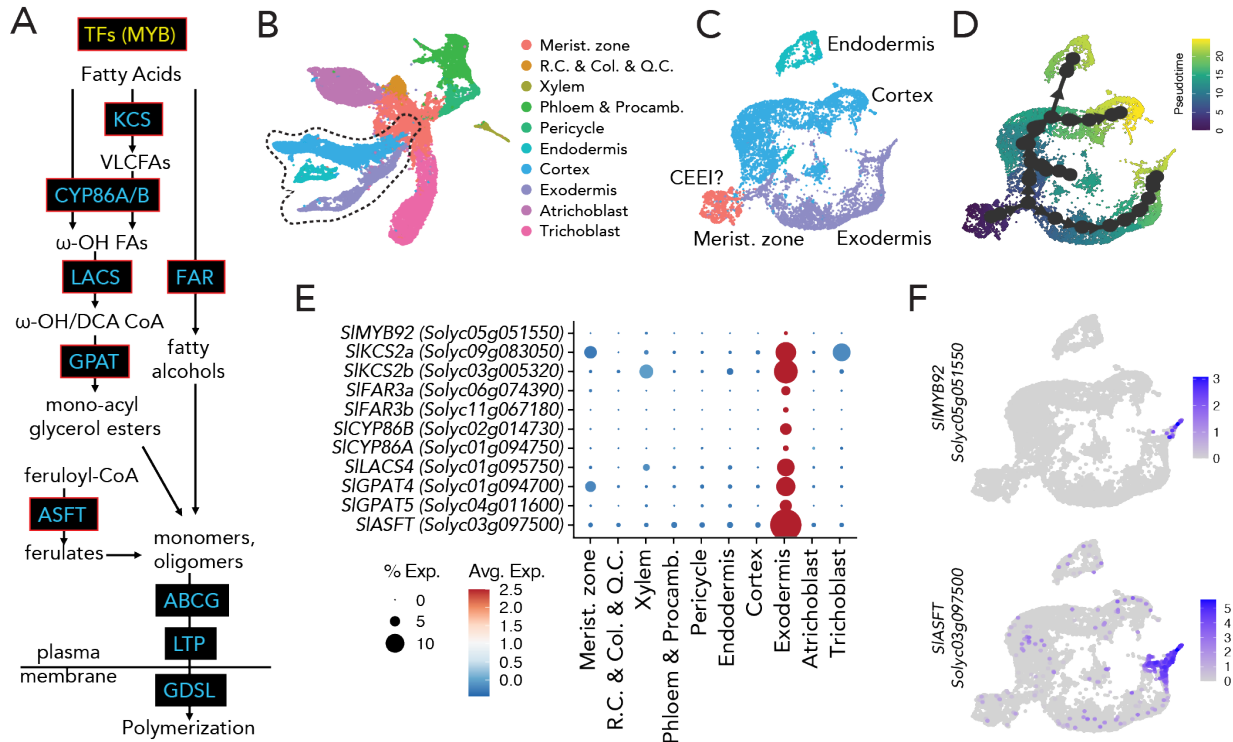

181  
 182 **Figure 2. The tomato suberin biosynthetic enzymes and transcriptional regulator are expressed in the mature**  
 183 **exodermis.** (A) Simplified diagram of the suberin biosynthesis pathway. Boxes indicate gene families involved in each  
 184 step of the pathway (blue and yellow indicate biosynthetic enzymes and transcriptional regulators, respectively). Genes  
 185 targeted in this study are outlined in red. (B) Annotated single cell clusters from tomato root 3 cm tip displayed by an  
 186 integrated uniform manifold approximation and projection (UMAP). (C) UMAP of Cortex/Endodermis/Exodermis-  
 187 annotated cells that were extracted from the general projection and re-embedded. A small cluster of cells from the  
 188 meristematic zone clusters were included to help anchor pseudo-time estimations. (D) A pseudo-time trajectory analysis  
 189 for the cortex/endodermis/exodermis cell populations. (E) Cell type or tissue-specific expression profiles for suberin  
 190 biosynthetic pathway genes. Dot diameter represents the percentage of cells in which each gene is expressed (%  
 191 Exp.); and colors indicate the average scaled expression of each gene in each developmental stage group with warmer  
 192 colors indicating higher expression levels. R.C.: Root cap. Q.C.: Quiescent center. Col: Columella. Procamb:  
 193 Procambium. CEEI: Cortex-exodermis-endodermis initial. (F) Expression of *SIMYB92* and *SIASF5* in the single cell  
 194 transcriptome data. The color scale represents log<sub>2</sub>-normalized corrected UMI counts.

195

## 196 **A single cell tomato root atlas to map the exodermal suberin pathway**

197 Although transcriptome profiles exist for the exodermis (Kajala et al., 2021), these data do  
 198 not provide resolution of the developmental gradient along which suberin is deposited. To refine  
 199 the candidate suberin-associated gene set, we conducted single cell transcriptome profiling of the  
 200 tomato root. Cells were isolated from a three-centimeter segment (two biological replicates) of  
 201 roots from tomato (M82) seedlings, where suberin deposition is observed. Once the data was pre-  
 202 processed and filtered for low quality droplets, the remaining high-quality transcriptomes of 22,207

203 cells were analyzed. After normalization, scaling, and dimensionality reduction via PCA, we  
204 visualized cells in a 2-dimensional space using uniform manifold approximation projection  
205 (UMAP) (**Figure 2B**) and identified 30 distinct clusters (**Supplemental Figure 5**). Cell clusters  
206 were then assigned a cell type identity using the following approaches. We first quantified the  
207 overlap with existing cell type-enriched transcript sets from the tomato root (Kajala et al., 2021)  
208 and marker genes from each of the clusters. An individual cluster was annotated as a specific cell  
209 type given the greatest overlap between the two sets and a significant adjusted p-value (<0.01).  
210 Then, pseudotime trajectories were mapped using a minimal spanning tree algorithm (Saelens et  
211 al., 2019). The tree was rooted in the root meristematic zone (identified in the previous step), and  
212 clusters were grouped into 10 cell types to reflect existing biological knowledge for differentiation  
213 of the tomato root (**Figure 2B** and **Supplemental Figure 5**). Lastly, genes with previously  
214 validated expression patterns in tomato (Bouzroud et al., 2018; Bucher et al., 1997; Bucher et al.,  
215 2002; Gómez-Ariza et al., 2009; Ho-Plágaro et al., 2019; Howarth et al., 2009; Jones et al., 2008;  
216 Li et al., 2018; Nieves-Cordones et al., 2010; Ron et al., 2014; von Wirén et al., 2000)(Manzano  
217 et al. Biorxiv 2022), transcriptional reporters (Kajala et al., 2021) and predicted cell type markers  
218 given their function in Arabidopsis (Shahan et al., 2022), were overlaid on the clusters to refine  
219 annotation (**Supplemental Figure 5C**).

220 Given the successful annotation of these cell types, we focused on the mapped  
221 developmental trajectories deriving from a presumed Cortex-Endodermal-Exodermal Initial  
222 (CEEI) population (**Figure 2C-D**). Within these three associated trajectories, we localized the cells  
223 in which the suberin biosynthetic enzymes and putative regulators were highly expressed  
224 (**Supplemental Table 3**). Of these, transcripts of *SIASFT* (*Solyc03g097500*), two *FAR* (*FAR3A*:  
225 *Solyc06g074390*; *FAR3B*: *Solyc11g067190*), two *CYP86* (*SICYPB86A*: *Solyc01g094750*;  
226 *SICYP86B1*: *Solyc02g014730*), two *KCS2* (*SIKCS2a*: *Solyc09g083050* and *SIKCS2b*:  
227 *Solyc03g005320*), two *GPAT* (*SIGPAT4*: *Solyc01g094700*; *SIGPAT5*: *Solyc04g011600*), and one  
228 *LACS* (*SILACS4*: *Solyc01g095750*) showed restricted expression at the furthest edge of the  
229 exodermal developmental trajectory (**Figure 2E-F** and **Supplemental Figures 6-7**). Of the three  
230 transcription factors previously noted (*SIMYB41*, *SIMYB63* and *SIMYB92*), only *SIMYB92* showed  
231 specific and restricted expression in cells at the tip of the exodermal trajectory (**Figure 2F** and  
232 **Supplemental Figure 7**). Based on the co-expression and cellular trajectory data, these genes  
233 served as likely candidates for an exodermal suberin transcriptional regulator and suberin  
234 biosynthetic enzymes.



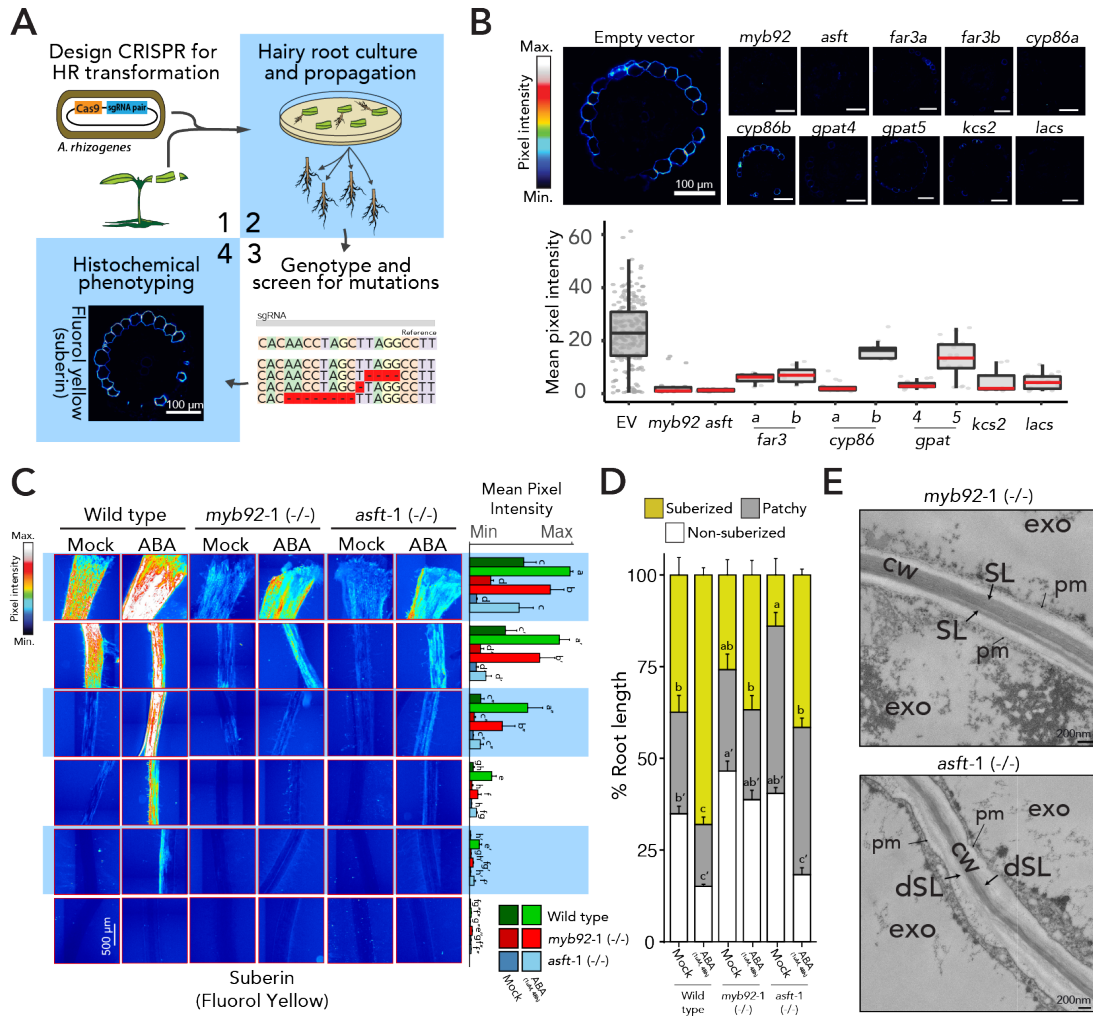

235  
 236 **Figure 3: Loss-of-function mutant alleles of candidate genes disrupt exodermal suberization in tomato.** (A)  
 237 Graphical summary of the hairy root (*R. rhizogenes*) mutant screen. (B) Summary of mutant phenotypes of candidate  
 238 genes in hairy roots. Representative cross sections of mature portions of the roots stained with fluorol yellow (FY) on  
 239 the top, and overall quantification of fluorol yellow signal across multiple cross sections ( $n \geq 6$ ). Red line indicates  
 240 statistically significant differences in fluorol yellow pixel intensity in the mutant vs. wild type as determined with a one-  
 241 way ANOVA followed by a Tukey HSD test (adj p-value < 0.05). (C) FY staining for suberin in 7-day-old wild-type  
 242 (repeated from figure 1 for reference), *slmyb92-1* and *slasft-1* plants treated with mock or 1  $\mu$ M ABA for 48 hours.  
 243 Whole-mount staining of primary roots across different sections (left) and quantification of fluorol yellow intensity along  
 244 the root (right) ( $n \geq 6$ ). Letters indicate significant differences (one-way ANOVA followed by a Tukey HSD test, adj p-  
 245 value < 0.05). (D) Developmental stages of suberin deposition in the 7-day-old wild-type and mutant plants treated with  
 246 mock or 1  $\mu$ M ABA for 48 h. Zones were classified as non-suberized (white), patchy suberized (gray) and continuously  
 247 suberized (yellow) ( $n \geq 6$ ). (E) Representative transmission electron microscopy cross-sections of *slasft-1* and *slmyb92-*  
 248 *1* mutants obtained at 1 mm from the root-hypocotyl junction. The *slasft-1* mutant presents a deficit in suberin lamellar  
 249 structure. exo = exodermis, SL = suberin lamellae, dSL = defective suberin lamellae, cw = cell wall, pm = plasma  
 250 membrane.

251

## 252 **Knock-out of candidate genes disrupt exodermal suberin deposition**

253 Functional validation of these enzymes was initially performed by CRISPR-Cas9 gene  
254 editing using two or three guide RNAs (**Supplemental Table 4**) and were introduced into tomato  
255 via *Rhizobium rhizogenes* (hairy root) transformation (Ron et al., 2014) (**Figure 3A**). Deletion-  
256 confirmed mutant alleles of these genes were phenotyped for suberin levels using fluorol yellow  
257 staining (**Figure 3B** and **Supplemental Figure 8**). Based on the histological phenotyping, all but  
258 the *slcyp86b* mutant showed a decrease in suberin (**Figure 3B**). Further confirmation of  
259 decreased suberin levels were obtained by suberin monomer metabolic profiling in the *slgpat5*,  
260 *slgpat4*, *slasft*, *slsacs* and *slmyb92* mutants (**Supplemental Figure 8**). These included collective  
261 reduction of ferulic acid and sinapic acid aromatic components; fatty acids (C20, C22, C24),  $\omega$ -  
262 hydroxyacids (C18:2, C18:1, C20, C24, C26) and  $\alpha$ - $\omega$ -diacids (C18:2, C18:1, C18, C20, C22).  
263 Given their expression in the terminus of the exodermal developmental trajectory (**Figure 2B**),  
264 stable transgenic *slasft* and *slmyb92* deletion mutant alleles were generated by transformation  
265 with *A. tumefaciens* using the same guide RNAs. Reduction of suberin levels as well as changes  
266 in its accumulation over the root developmental trajectory were observed in two independent  
267 mutant alleles of each gene (**Figure 3C-D**, **Supplemental Figure 8**). In the case of *slasft*, the  
268 significant delay in suberin deposition and changes in monomer composition in the exodermis  
269 differs from its ortholog in Arabidopsis, in which the *atasft* mutant presents no defects in either  
270 deposition timing or major monomer composition changes outside of the reduction in ferulate  
271 content (Andersen et al. 2021; Molina et al. 2009). We also observed disorganization of the  
272 lamellar structure in the *slasft-1* mutant, but not in *slmyb92-1* mutant (**Figure 3E**). While reduction  
273 of ferulic acids has been found in mutants of *ASFT* orthologs in potato (Serra et al., 2010), this  
274 lamellar disorganization has not been reported before.

275 In Arabidopsis, ABA application increases suberin levels, and four MYB transcription  
276 factors are redundantly and partially required for induction of ABA-mediated suberin accumulation  
277 in Arabidopsis (AtMYB41, AtMYB53, AtMYB92 and AtMYB93) (Barberon et al., 2016; Shukla et  
278 al., 2021). Given the ABA-inducibility of suberin in Arabidopsis and tomato (**Figure 1C-D**)  
279 (Barberon et al., 2016; Baxter et al., 2009; Hosmani et al., 2013) we hypothesized that SIMYB92  
280 or SIASFT are necessary for ABA-induced suberin biosynthesis. Therefore, we treated *slmyb92*  
281 and *slasft* roots with 1 $\mu$ M ABA for 48 hours, a concentration of ABA that is sufficient to increase  
282 the completely suberized zone in tomato without perturbing root length (**Figure 1A**,  
283 **Supplemental Figure 10**). Although suberin levels were increased upon ABA treatment in these  
284 mutant backgrounds, both in the magnitude of the fluorol yellow signal and the proportion of the  
285 root which is completely suberized, the degree to which they were increased is reduced compared

286 to wild type (**Figure 3C-D**). This decrease in suberin levels in the *slmyb92-1* single mutant in both  
287 control and ABA-treated conditions is qualitatively greater than what was observed in the single  
288 mutant in Arabidopsis (Shukla et al., 2021). The lack of this phenotype in the Arabidopsis single  
289 mutant and the in the ABA-induced *atmyb92-1* mutant is explained by redundancy of the  
290 *AtMYB41*, *AtMYB53*, *AtMYB92* and *AtMYB93* transcription factors (Shukla et al. 2021). We  
291 explored whether such redundancy exists in tomato in the hairy root loss-of-function mutant  
292 alleles of *slmyb41* and *slmyb63* and whether they were sufficient to decrease exodermal suberin  
293 in control and water deficit conditions. ABA treatment was not able to induce suberin to wild type  
294 levels in any of the mutants (**Supplementary Figure 8D**). Since the exodermis is first lignified  
295 and then suberized (Kajala et al. 2021), we also explored whether *SIMYB92*, *SIMYB41* or  
296 *SIMYB63* were involved in lignification of the tomato root. However, the levels of lignin in the  
297 exodermis and endodermis remained unaffected in any of the hairy root mutants of these  
298 transcriptional regulators (**Supplemental Figure 11**), suggesting they do not play a role in the  
299 initial lignification of neither the exodermis nor the endodermis.

300

### 301 **Impaired suberin deposition alters the plant's response to water limitation**

302 Given the suggested link between suberin and drought tolerance, as well as the decreased  
303 suberin levels in both control and ABA conditions in our tomato mutants, we hypothesized that  
304 the *slmyb92* and *slasft* lines would be more sensitive to water limited conditions compared with  
305 wild type plants. We subjected four-week-old well-watered plants to ten days of water deficit  
306 conditions (**Methods**). Suberin monomer levels were measured in the root system of *slmyb92-1*  
307 and *slasft-1* and WT, in both the water-sufficient and water-limited conditions. Under water-  
308 sufficient conditions no significant differences were observed in the very long chain fatty acids,  
309 primary alcohols,  $\omega$ -hydroxy acids,  $\alpha$ - $\omega$ -dicarboxylic acids and aromatic components of suberin  
310 (**Figure 4A** and **Supplemental Figure S12**). Under water limitation however, the transcriptional  
311 regulator mutant *slmyb92-1* showed a general reduction of most monomer groups compared to  
312 wild type. The *slasft-1* mutant, in comparison, was primarily depleted in ferulic acid and its  
313 esterification substrates, as well as in individual primary alcohols and  $\omega$ -hydroxy acids (**Figure**  
314 **4A**). Furthermore, stem water potential, stomatal conductance, and transpiration rate were  
315 significantly decreased in response to water limited conditions in both *slmyb92-1* and *slasft-1*  
316 relative to wild type; and leaf relative water content was also decreased in *slmyb92-1* (**Figure 4B-**  
317 **E**). When considering all physiological traits collectively using Principal Component Analysis,  
318 *slasft-1* showed a milder water deficit response compared to WT, while *slmyb92-1* was more  
319 extreme (**Supplementary Figure 13**). These data demonstrate that decreased suberin levels in

320 the tomato root exodermis directly perturb whole plant performance under water limited, but not  
 321 water sufficient conditions. Furthermore, changes in specific suberin monomers and the lamellar  
 322 structure that were observed between the two mutants in response to water limited conditions  
 323 may differently influence the extent of the physiological response.

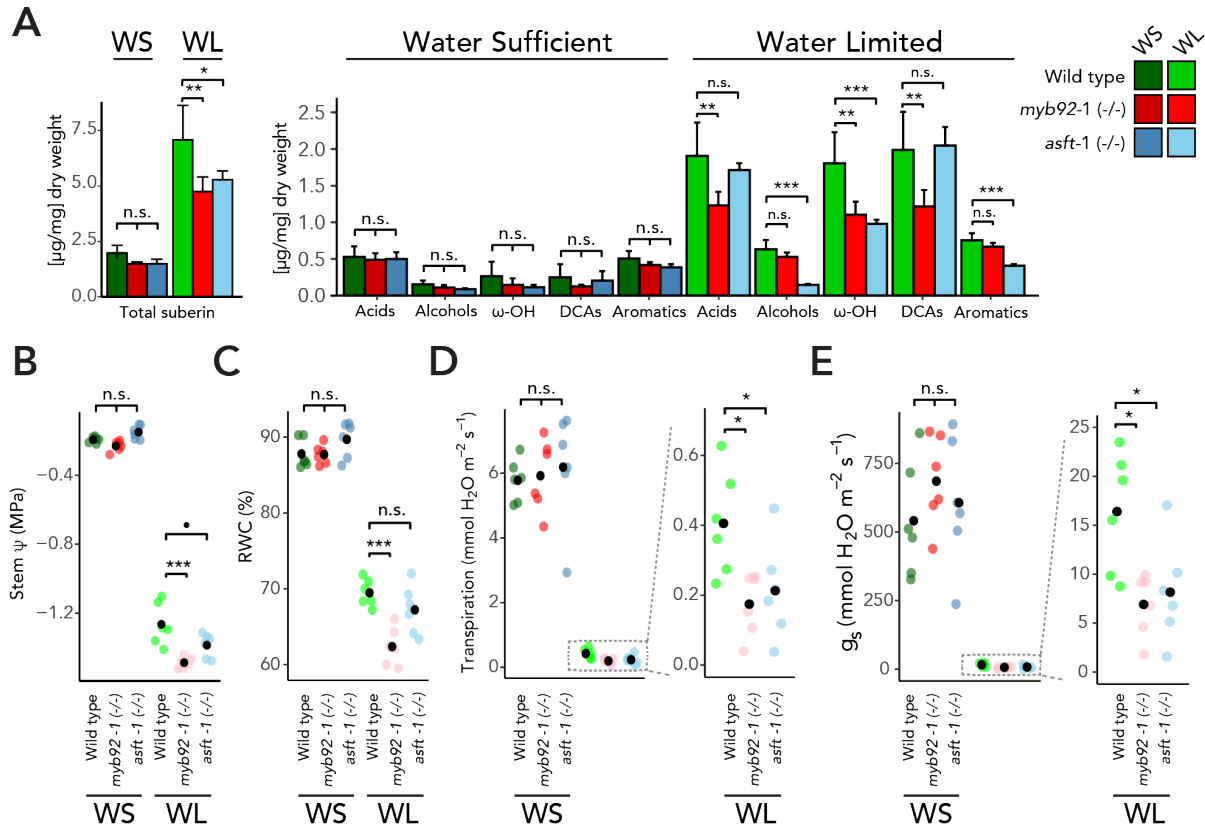

324  
 325 **Figure 4: Impaired suberin deposition in *slmyb92-1* and *slasft-1* perturbs their whole plant performances in**  
 326 **response to water limitation.** (A) Suberin composition in roots of mature one-month-old wild type, *slmyb92-1* and  
 327 *slasft-1*. Plants were exposed to 10 days of water sufficient (WS) and water limitation (WL) regimes (n = 4, Methods).  
 328 Acid: fatty acids; Alcohols: primary alcohols; ω-OH: ω-hydroxy fatty acids; DCA: dicarboxylic fatty acid; Aromatics:  
 329 ferulate and coumarate isomers. Dot plots of recorded values for (B) Stem Water Potential (stem  $\Psi$ ), (C) Relative Water  
 330 Content, (D) Transpiration, and (E) Stomatal conductance ( $g_s$ ). Dotted line indicates zoom in for better visual  
 331 resolution of values. Black dots indicate mean values (n=6). One-way ANOVAs for each treatment were performed followed by  
 332 post-hoc Tukey HSD test. Significance: '\*\*\*\*' <0.001 '\*\*\*' <0.01 '\*' <0.05 '.' <0.1.

333  
 334 **DISCUSSION**

335 In the well-characterized Arabidopsis root endodermis, suberin is deposited as a hydrophobic  
 336 layer between the plasma membrane and the primary cell wall (reviewed in Serra and Geldner,  
 337 2022). Developmentally, suberin biosynthesis and deposition occurs as a second step of  
 338 endodermal differentiation, the first being the synthesis and deposition of the lignified Casparian

339 strip (Naseer et al., 2012). Suberin serves as an apoplastic barrier and a transcellular barrier, thus  
340 contributing to the regulation of the movement of water and solutes to the vascular cylinder (Calvo-  
341 Polanco et al., 2021). Our collective observations demonstrate that in the tomato root this pathway  
342 has distinct spatial regulation relative to Arabidopsis, yet the regulation through developmental  
343 time is conserved (**Figure 1**). Spatially, in the tomato root exodermis suberin lamellae are  
344 deposited between the exodermal primary cell wall and the plasma membrane all around the cell,  
345 similar to the Arabidopsis root endodermis and other suberized apoplastic barriers such as the  
346 potato periderm (**Figure 1B**) (Gou et al., 2017; Molina et al., 2009; Serra et al., 2010). In a  
347 temporally similar fashion to the Arabidopsis endodermis, there is a non-suberized zone at the  
348 root tip, a patchy suberized zone in the middle of the root, and a continuously suberized zone  
349 nearer to the root-hypocotyl junction (**Figure 1C-D**).

350 We obtained clues to the underlying genes controlling exodermal suberin biosynthesis  
351 over developmental time by co-expression analysis and single cell transcriptome profiling.  
352 Conservation of the biosynthetic pathway between Arabidopsis and tomato is evident from the  
353 functional genetic analysis of enzymes within the pathway as well as of the *MYB92* transcription  
354 factor. A distinct deviation from this conservation of suberin biosynthesis is the perturbed lamellar  
355 structure in the tomato *slasft* mutant. Conversely, in the Arabidopsis and potato mutants, there is  
356 a reduction in ferulates associated with suberin, and increases and decreases of a variety of  
357 monomers (Molina et al., 2009) (Serra et al., 2010). This suggests both novelty and a conserved  
358 function of SIASFT. Although *SIMYB92* was expressed at the end of the exodermal trajectory, the  
359 length of this trajectory is likely limited by our ability to completely protoplast cells with secondary  
360 cell wall deposition. Indeed, mutants in tomato orthologs of Arabidopsis *MYB41* and *MYB63*  
361 showed exodermal suberin phenotypes suggesting these genes may be expressed in later  
362 exodermal developmental stages. The decrease of suberin levels in *slmyb92* mutant alleles as  
363 measured by fluorol yellow (**Figure 3B-D**) and compositional profiling in hairy roots and stable  
364 lines (**Supplemental Figures 8 and 12**) demonstrate likely redundancy in this process. This  
365 redundancy in transcriptional regulation, although not necessarily via the same factors, is again  
366 conserved between Arabidopsis and tomato (Shukla et al., 2021). What remains to be identified,  
367 however, are the factors or regulatory elements that determine exodermal-specific regulation of  
368 these enzymes and transcriptional regulators, as well as how they are activated by ABA and why  
369 their activity is ABA-independent in *S. pennellii*.

370 ABA-mediated regulation of suberization is morphologically consistent with what is  
371 observed in the Arabidopsis root endodermis, with an increase in both the magnitude of suberin  
372 deposition, and an increased proportion of the completely suberized zone (Barberon et al., 2016;

373 Shukla et al., 2021), albeit in a different cell type from the endodermis. At least in the case of the  
374 *slmyb92* and *slasft* mutant alleles and the ABA assays, this transcription factor and biosynthetic  
375 enzyme influence both developmental and ABA-mediated suberin deposition patterns (**Figure**  
376 **3C-D**). Further analyses of mutant alleles of the tomato *SIMYB41* and *SIMYB62* transcription  
377 factors will determine if a coordinated developmental and stress-inducible regulation of suberin  
378 biosynthesis is the norm for exodermal suberin. The degree to which this regulation is dependent  
379 on ABA signalling, as it is in Arabidopsis (Barberon et al., 2016), also remains to be observed.

380 External application of ABA can be considered a proxy for both drought and salt stress  
381 response (Zhu 2002; Raghavendra et al. 2010). We tested the necessity of suberized exodermis  
382 for whole plant performance under water limited conditions in mature tomato plants (Figure 4).  
383 The strongly reduced response of *slmyb92* and *slasft* to ABA was similarly observed upon drought  
384 stress. In both experiments *slmyb92-1* and *slasft-1* failed to reach fluorol yellow signals and  
385 suberin levels equal to the control. Under control conditions (water-sufficient) we detected overall  
386 low suberin levels, which were near the detection limit of 0.003 µg/mg and reduced our ability to  
387 identify significant differences between the lines. The effect observed in chemical suberin  
388 quantification may have also been attenuated by the sample comprising whole root systems  
389 comprised of highly branched lateral roots and including root areas with immature suberin.  
390 AtMYB92 is also known to regulate lateral root development in Arabidopsis together with its close  
391 ortholog AtMYB93 (Gibbs et al., 2014) and differences in suberin within different root types are a  
392 possibility. Regardless, suberin monomeric levels were clearly decreased in the *slmyb92-1* and  
393 *slasft-1* mutants in a distinct and overlapping fashion in response to water limited conditions.  
394 Consistent with its function, *slasft-1* was primarily defective in accumulation of ferulate, primary  
395 alcohols and ω-hydroxyacids (**Figure 4A, Figure S9**); while *slmyb92-1* had defects in fatty acids  
396 and the predominant unsaturated C18:1 ω-hydroxyacids and dicarboxylic acids (**Figure 4A,**  
397 **Figure S9**). The more extreme perturbation of physiological responses in response to water  
398 limitation in *slmyb92-1* suggests that suberin composed of these fatty acid derivatives play a role  
399 in controlling transcellular-mediated uptake of water (**Figure 4B-C**). How the transcellular  
400 pathway operates in a root system where this apoplastic barrier is located four cell layers from  
401 the vascular cylinder, remains an important and open question.

402 The role of exodermal suberin as an apoplastic barrier to water flow has been studied in  
403 maize and rice, where it was determined as a barrier to water flow, although maize and rice also  
404 present a suberized endodermis (Zimmermann et al., 2000). Thus, the role of exodermal suberin  
405 alone has never been studied with respect to its influence on plant responses to water limitation.  
406 The precise role of endodermal suberin, independent of the Casparian strip, has been studied in

407 Arabidopsis, which lacks an exodermis (Calvo-Polanco et al., 2021). In 21-day-old,  
408 hydroponically-grown Arabidopsis plants, the *horst-1*, *horst-2*, *horst-1 ralph-1*, pCASP1:CDEF1  
409 mutants with a functional Casparian strip (Calvo-Polanco et al., 2021), but with reduced suberin  
410 (Compagnon et al., 2009; Höfer et al., 2008; Naseer et al., 2012) were monitored for the  
411 importance of suberin in water relations. These mutants, except for *horst-2*, have higher  $L_p_r$  (root  
412 hydraulic conductivity) and root aquaporin activity relative to WT (Calvo-Polanco et al., 2021).  
413 One can extrapolate that the decrease in stem water potential, transpiration, and stomatal  
414 conductance relative to wild type in water limited conditions (**Figure 4B-C**) are a consequence of  
415 decreased suberin (*slmyb92*) or perturbations in suberin composition (*slasft*). Assuming our  
416 suberin-defective mutants have higher root hydraulic conductivity (Calvo-Polanco et al. (2021)),  
417 our hypothesis to reconcile our observations with the higher  $L_p_r$  would be that our mutants have  
418 compromised water use efficiency under water limitation. This could lead to a delayed onset of  
419 the drought response such that the water loss is too great to recover by the time stomata are  
420 closed. The mechanisms by which this occurs needs to be determined and could benefit from  
421 further exploration. The levels of lignin in the exodermis and endodermis were not altered in the  
422 mutants of the identified transcriptional regulators (**Supplemental Figure 11**), and perturbations  
423 in endodermal lignin alone have no influence on root hydraulic conductivity in Arabidopsis (Calvo-  
424 Polanco et al., 2021), thus, lignin plays no role in our observations.

425 To the best of our knowledge, a plant's response to water limitation has never been  
426 investigated in plants with decreased root exodermal suberin levels. The importance of plant  
427 radial and cellular anatomy has also long been known as critical to our understanding of the role  
428 of plant roots in water uptake (Steudle, 2000) in the face of water-deficit. Therefore, our findings  
429 provide direct evidence, via genetic perturbation, for the role of suberin in a specific cell type  
430 mediating tomato's adaptive response to water-deficit. Further, they impart a model by which  
431 exodermal suberin barriers contribute to whole plant water relations, in the absence of a suberized  
432 endodermis.

433 Suberin in plants roots has recently been proposed to be an avenue to combat climate  
434 change including via sequestration of atmospheric CO<sub>2</sub> as well as in conferring drought tolerance  
435 (Thompson, 2017). This study provides evidence that root suberin is necessary for tomato's  
436 response to water deficit conditions. Increasing suberin levels within the root exodermis and/or  
437 the endodermis may indeed serve as such an avenue. The constitutive production of exodermal  
438 suberin in the drought tolerant and wild relative of tomato, *Solanum pennellii* (**Supplemental**  
439 **Figure 3**) (Gur and Zamir, 2004; Gur et al., 2011; Pillay and Beyl, 1990) certainly provides a clue  
440 that maintenance of suberin in non-stressed and stressed conditions may result in such a benefit.

441 However, trade-offs of such an increase must also be considered. Increased suberin levels have  
442 been associated with pathogen tolerance (Holbein et al., 2019; Kashyap et al., 2022; Thomas et  
443 al., 2007), but also can serve as a barrier to interactions with commensal microorganisms (Salas-  
444 González et al., 2021), and could constrain nutrient uptake, plant growth or seed dormancy  
445 (Beisson et al., 2007; Cohen et al., 2020; To et al., 2020). Regardless, this complex biopolymer  
446 serves as an elegant example of how plant evolution has resulted in the different but precise  
447 spatiotemporal biosynthesis and deposition patterns of a specialized polymer to enable a plant's  
448 response to the environment.

449

## 450 **MATERIALS & METHODS**

451 **Plant material and growth conditions.** All tomato (*Solanum lycopersicum*) lines used in this  
452 study were derived from cultivar M82 (LA3475). The *Solanum pennellii* line used was LA0716.  
453 Seeds were surface sterilized in 70% (v/v) ethanol for 5 min followed by 50% (v/v) commercial  
454 bleach for 20 min and three washes with sterile deionized water. Seeds were plated on  
455 12cmx12cm plates (without sucrose) or in Magenta boxes (with 30 g L<sup>-1</sup> sucrose) containing 4.3  
456 g L<sup>-1</sup> Murashige and Skoog (MS) medium (Caisson; catalog no. MSP09-50LT), 0.5 g L<sup>-1</sup> MES,  
457 pH 5.8, and 10 g L<sup>-1</sup> agar (Difco; catalog no. 214530) and maintained in a 23°C incubator with  
458 16/8h light/dark periods for 7-10 days, until cotyledons were fully expanded and the true leaves  
459 just emerged. At that point, and depending on the experiment, seedlings were either harvested  
460 or transferred to soil.

461

462 **Tomato transformation.** Hairy root transformants were generated based on published work (Ron  
463 et al. 2014). In brief, *Rhizobium rhizogenes* (Strain ATCC 15834) transformed with the desired  
464 binary vector was used to transform expanding tomato cotyledons. Using a scalpel, 7-10 day old  
465 M82 cotyledons were cut and immediately immersed in the bacterial suspension for 20 minutes,  
466 blotted on sterile Whatman filter paper, and co-cultivated for 3 days at 25°C in dark on MS agar  
467 plates (1X with vitamins, 3% sucrose, 1% agar) without antibiotic selection. Cotyledons were then  
468 transferred to MS plates with a broad spectrum antibiotic cefotaxime (200 mg L<sup>-1</sup>) and kanamycin  
469 (100 mg L<sup>-1</sup>) for selection of successfully transformed roots. Fifteen independent antibiotic-  
470 resistant roots were subcloned for each construct for further analysis. Stable transgenic lines were  
471 generated by *Agrobacterium tumefaciens* transformation at the UC Davis Plant Transformation  
472 Facility.

473



474 **Transcriptome Profiling of M82 Roots under Drought and Waterlogging Stress.** Seeds of  
475 *SICO2p:TRAP* and *AtPEPp:TRAP* cv. M82 (Kajala et al., 2021) were surface-sterilized with 3%  
476 hypochlorite (Clorox) for 20 minutes, rinsed three times with sterile water and plated on 1xMS  
477 media with 200 mg/ml kanamycin. Seven days after germination, seedlings were transplanted  
478 into 15cm x 15cm x 24cm pots with Turface Athletic Profile Field & Fairway clay substrate (Turf  
479 Athletics) pre-wetted with a nutrient water solution (4% nitrogen, 18% phosphoric acid, and 38%  
480 soluble potash). Plants were grown in a completely randomized design for 31 days in a Conviron  
481 Growth Chamber at 22C, 70% RH, 16/8 hour light/dark cycle and light intensity of 150-200  
482 mmol/m<sup>2</sup>/s. For “well-watered” conditions, we maintained substrate moisture at 40-50% soil water  
483 content. We based this selection on pilot experiments where we monitored tomato development  
484 and physiology, including photosynthesis measurements with a LICOR 6400XT, local  
485 temperature and leaf surface temperatures measured with an infrared digital thermometer, and  
486 relative water content (RWC) measured from terminal leaflets from the youngest expanded leaf.  
487 As our water deficit treatment, we withheld water from the plants for 10 days prior to harvest, and  
488 as our waterlogged condition, we submerged the pot until the root-to-shoot junction. We harvested  
489 the roots as close to relative noon as feasible ( $\pm 2$ h) by immersing the pot into cool water,  
490 massaging the rootball free, rinsing three times sequentially with water, and then dissecting the  
491 root tissues and flash-freezing with liquid nitrogen. We harvested the lateral roots at the depth of  
492 6-12 cm and 1-cm root tips of adventitious roots for the RNAseq experiment. RNA sequencing  
493 libraries were synthesized from four biological replicates from the *SICO2p:TRAP* and  
494 *ATPEPp:TRAP* lines, with the exception of the control for *SICO2p:TRAP* lateral roots in control  
495 conditions (five biological replicates). Sequencing libraries of adventitious roots were generated  
496 for each line in control and waterlogging conditions, and from lateral roots in control, waterlogging  
497 and water deficit conditions. Total RNA was isolated from these roots as described in (Reynoso  
498 et al., 2019); and non-strand specific random primer-primed RNA-seq library construction  
499 performed as described originally by (Townsend et al., 2015). We pooled the RNAseq libraries  
500 together and sequenced them with the Illumina HiSeq 4000 at the UC Davis DNA Technologies  
501 Core to obtain 50-bp single-end reads.

502

503 **RNA-sequencing data processing and analysis - drought, water deficit and introgression**  
504 **line population.** RNA-sequencing data processing and analyses for the drought, waterlogging  
505 and introgression line population were conducted as previously described (Kajala et al., 2021).  
506 Sequences were pooled, and then trimmed and filtered using TrimGalore (Krueger, 2012), with  
507 parameter -a GATCGGAAGAGCAC. Trimmed reads were pseudo-aligned to the ITAG3.2

508 transcriptome (cDNA) (Tomato Genome Consortium, 2012) using Kallisto (v0.43.1) (Bray et al.,  
509 2016), with the parameters -b 100–single -l 200 -s 30, to obtain count estimates and transcript  
510 per million (TPM) values. Raw RNA-seq read counts were filtered to remove genes with zero  
511 counts across all samples. Samples were clustered with cuttreestatic (Langfelder and Horvath,  
512 2008) and outliers removed with a minSize of 10. No outliers were observed for the drought and  
513 waterlogging dataset, although GSM2323699 (Toal et al., 2018) from the introgression line  
514 dataset was removed as an outlier.

515

516 **Generation of tomato CRISPR constructs.** Target guides were designed using the CRISPR-  
517 PLANT web tool (<https://www.genome.arizona.edu/crispr/CRISPRsearch.html>) (**Supplemental**  
518 **Table 4**). In cases where CRISPR-PLANT did not specify at least three guides with GC content  
519 between 40 to 60%, guides were designed with CRISPR-P V2 ([http://crispr.hzau.edu.cn/cgi-](http://crispr.hzau.edu.cn/cgi-bin/CRISPR2/CRISPR)  
520 [bin/CRISPR2/CRISPR](http://crispr.hzau.edu.cn/cgi-bin/CRISPR2/CRISPR)), using the U6 snoRNA promoter with < 3 mismatches within the target  
521 gene coding sequence. Genomic sequences (ITAG3.2) were retrieved from Phytozome  
522 (<https://phytozome-next.jgi.doe.gov/>) and gene maps were constructed with SnapGene. Primers  
523 for genotyping were designed with Primer-BLAST software  
524 (<https://www.ncbi.nlm.nih.gov/tools/primer-blast/>). Primer specificity was checked against  
525 *Solanum lycopersicum* RNA entries from NCBI's Reference Sequence collection, using RefSeq  
526 RNA as a database. In cases where only two gRNAs were selected (initial round of the cloning),  
527 cloning was performed based on Fauser et al. (2014). In summary, oligo containing the sgRNA  
528 PAM sequence were ligated into pMR217/218 vectors, and then recombined via Gateway  
529 assembly into a pMR290 vector containing Cas9 and Kan resistance expression cassettes (Bari  
530 et al. 2019). In cases where three gRNAs were selected (second round of cloning), cloning of  
531 guide RNAs was performed based on Lowder et al. (2015). In summary, oligos containing the  
532 sgRNA PAM sequence were phosphorylated and ligated into pYPQ131-3 vectors, and then  
533 recombined into pYPQ143 via Golden Gate assembly. A pMR278 vector containing all 3 gRNA  
534 expression cassettes was then recombined into a pMR286/289 vector containing Cas9 and Kan  
535 resistance expression cassettes (Bari et al. 2019). All the final CRISPR vectors were introduced  
536 into *Rhizobium rhizogenes* (Hairy roots) and *Agrobacterium tumefaciens* (Stable lines) for  
537 transgenic generation.

538

539 **CRISPR-Cas9 mutant generation and analysis.** Transgenic hairy root and stable lines  
540 containing the CRISPR binary vectors were screened for mutations in the genes of interest.  
541 Independently transformed lines were genotyped at the targeted genomic region (small guide

542 RNA and oligo sequences are found in **Supplemental Tables 4 and 5**). In the case of hairy roots,  
543 at least 2 lines containing large deletions in both alleles in the gene of interest were kept for further  
544 analysis. In the case of stable transformants, first-generation (T0) transgenics were genotyped  
545 via Sanger sequencing. After genotyping and self-pollination in a greenhouse, T1 seeds from T0  
546 plants with the mutated genes were sown. Plants were screened, and lines that did not contain  
547 the CRISPR construct anymore and had homozygous mutant alleles were selected. T2 and T3  
548 seeds obtained from self-pollination in a greenhouse were used in subsequent experiments.

549

550 **Water Deficit Assay.** 7-day old seedlings were transferred to 0.5L cones containing Turface  
551 Athletic Profile Field & Fairway clay substrate (Turface Athletics) that was pre-wetted with a  
552 nutrient water solution (containing 4% nitrogen, 18% phosphoric acid, and 38% soluble potash).  
553 All pots were weight adjusted, and a small set of pots were dried so that the percentage of water  
554 in the soil could be calculated based on pot weight. Plants were then grown in a completely  
555 randomized design for three weeks in a Conviron Growth Chamber at 22°C, 70% RH, 16/8 hour  
556 light/dark cycle and light intensity around 150  $\mu\text{mol}/\text{m}^2/\text{s}$ , and watered to soil saturation every  
557 other day. At the end of the first week in the chamber, vermiculite was added to the top of the  
558 cones to limit water evaporation from the soil. Following three weeks, plants of each line were  
559 randomly split into two groups and plants were exposed to different treatments for 10 days  
560 (drought and control). Six “control” plants per line were kept in a “water sufficient” regime and  
561 watered to soil saturation with nutrient solution every day. Six “drought” plants per line were kept  
562 in a “water limited” regime as follows: Plants were gradually subjected to water deficit by adjusting  
563 pots weight daily with nutrient solution (to the highest weight of the set) until a target soil water  
564 content of 40-50% was obtained. On the day of harvesting, between 9:00 to 12:00 am, stomatal  
565 conductance and transpiration were measured on the abaxial surface of the terminal leaflet of the  
566 3rd leaf or the youngest fully expanded leaf using LICOR-6400XT. Light intensity was kept at  
567 1,000  $\mu\text{mol m}^{-2} \text{s}^{-1}$ , with a constant air flow rate of 400  $\mu\text{mol s}^{-1}$  and a reference  $\text{CO}_2$  concentration  
568 of 400  $\mu\text{mol CO}_2 \text{ mol}^{-1}$  air. The 3rd (either left or right) primary leaflet was collected for measuring  
569 relative water content using a modified version of a previously established protocol (Sade et al.  
570 2015). In short, fresh leaves were cut with a scalpel leaving a 1-cm-long petiole and the total fresh  
571 weight (TFW) was measured. Leaves were then placed in individual Zipper-locked plastic bags  
572 containing 1 mL of deionized water, making sure that only the leaf petiole is immersed in the  
573 solution. Bags were incubated at 4 °C. After 8 h, leaves were taken out of the bags and put it  
574 between two paper towels to absorb excess water; and then weighed to determine the turgid  
575 weight (TW). Each sample was then placed into a paper bag and dried in a 60 °C dry oven for 3-

576 4 days. Dried samples were weighed to determine the dry weight (DW), and relative water content  
577 was calculated as:  $RWC(\%) = (TFW - DW) * 100 / (TW - DW)$ . A section of the 4th leaf, containing the  
578 terminal and primary leaflets was used to measure stem water potential (McCutchan and Shackel,  
579 1992) using a pump-up pressure chamber (PMS Instrument Company, Albany, OR). The root  
580 systems were harvested by immersing the cone into water, massaging the root ball free, and  
581 rinsing with water to remove as much clay substrate as possible. Plants were then placed on  
582 paper towels to remove excess water, and the middle section of the root system was sectioned  
583 using a scalpel. Around 300mg of the dissected root tissue were added to Ankon filter bags  
584 (sealed with a staple). Bags were transferred into a glass beaker, an excess of  
585 chloroform:methanol (2:1, v/v) was added and extracted for 2h. Fresh chloroform:methanol (2:1,  
586 v/v) was replaced and the extraction was repeated overnight under gentle agitation (twice). Fresh  
587 chloroform:methanol (1:2, v/v) was added and extracted for 2h. The extraction was repeated  
588 overnight twice with fresh chloroform:methanol (1:2, v/v). Finally, samples were extracted with  
589 methanol for 2h. Methanol was removed, and bags were dried in a vacuum desiccator for 72h.  
590 Suberin monomer analysis was performed in these samples as stated below.

591  
592 **ABA Assay.** Seedlings were germinated in MS plates as stated above. 5 days after germination,  
593 seedlings from a plate were randomly transferred to fresh MS plates containing either 1  $\mu$ M ABA  
594 or mock. After 48h of treatments in a 23°C incubator with 16/8h light/dark, roots were harvested  
595 and used in subsequent analyses.

596  
597 **Co-expression network analysis.** Co-expression network modules were generated with the  
598 WGCNA R package (v1.70). Bulk RNAseq libraries from M82 roots under drought stress and the  
599 control, and a published root expression dataset from an IL panel (Toal et al. 2018) were used for  
600 this analysis. Libraries were quantile normalized and a soft threshold of 8 was used to create a  
601 scale-free network. A signed network was created choosing a soft thresholding power of 8,  
602 minModuleSize of 30, the module detection sensitivity deepSplit of 2, mergeCutHeight of 0.3.  
603 Genes with a consensus eigengene connectivity to their module eigengene lower than 0.2 were  
604 removed from the module (minKMEtoStay). Modules were correlated with upregulated genes in  
605 DCRi lines from the Lashbrooke et al. 2016 paper using Fisher's exact test.

606  
607 **Protoplast isolation and scRNA-seq.** This protocol is a modified version of the Arabidopsis  
608 single cell sequencing in Shahan et al. (2021). In summary, seven days after sowing, 50-100  
609 primary roots per sample of length ~3 cm from the root tip were cut and placed in a 35 mm-

610 diameter dish containing a 70  $\mu\text{m}$  cell strainer and 4.5 mL enzyme solution (1.25% [w/v] Cellulase  
611 R10, 1.25% Cellulase RS, 0.3% Macerozyme R10, 0.12% Pectolyase, 0.6 M mannitol, 20 mM  
612 MES (pH 5.7), 20 mM KCl, 10 mM  $\text{CaCl}_2$ , 0.1% bovine serum albumin, and 0.000194% (v/v) -  
613 mercaptoethanol). Cellulase Onozuka R10, Cellulase Onozuka RS, and Macerozyme R10 were  
614 obtained from Yakoult Pharmaceutical Industries. Pectolyase was obtained from Sigma-Aldrich  
615 (P3026). After digestion at 25°C for 2 hours at 85 rpm on an orbital shaker with occasional stirring,  
616 the cell solution was filtered twice through 40  $\mu\text{m}$  cell strainers and centrifuged for 5 minutes at  
617 500 x g in a swinging bucket centrifuge with the acceleration set to minimal. Subsequently, the  
618 pellet was resuspended with 1 mL washing solution (0.6 M mannitol, 20 mM MES (pH 5.7), 20  
619 mM KCl, 10 mM  $\text{CaCl}_2$ , 0.1% bovine serum albumin, and 0.000194% (v/v) -mercaptoethanol)  
620 and centrifuged for 3 minutes at 500 x g. The pellet was resuspended with 1mL of washing  
621 solution and transferred to a 1.7mL microcentrifuge tube. Samples were centrifuged for 3 minutes  
622 at 500 x g and resuspended to a final concentration of  $\sim 1000$  cells/ $\mu\text{L}$ . Single cell transcriptome  
623 libraries were then prepared by the UC Davis DNA Technologies Core. The protoplast suspension  
624 was then loaded onto microfluidic chips (10X Genomics) with v3 chemistry to capture 10,000  
625 cells/sample. Cells were barcoded with a Chromium Controller (10X Genomics). mRNA was  
626 reverse transcribed and Illumina libraries were constructed for sequencing with reagents from a  
627 3' Gene Expression v3 kit (10X Genomics) according to the manufacturer's instructions.  
628 Sequencing was performed with a NovaSeq 6000 instrument (Illumina) to produce 100bp paired  
629 end reads.

630

631 **Protoplasting-Induced Genes.** Protoplast samples were obtained following the same strategy  
632 as for the single cell library preparation. Once protoplasts were purified, total RNA was extracted  
633 using the Direct-zol RNA Miniprep kit (ZYMO). Bulk RNAseq libraries were prepared using the  
634 QuantSeq 3' mRNA-Seq Library Prep Kit FWD (Lexogen). Barcoded libraries were then pooled  
635 together, and PE 150-bp reads were sequenced on the NovaSeq 6000 instrument (Illumina) at  
636 the UC Davis DNA Technologies Core. Sequences were pooled, and then trimmed and filtered  
637 using Trim Galore! (v0.6.6). R1 Trimmed reads were pseudo-aligned to ITAG4.1 transcriptome  
638 (cDNA) using Kallisto (v0.46.2), with the parameter -b 100, to obtain count estimates and  
639 transcript per million (TPM) values. Differential expression analysis was performed in edgeR  
640 (v3.34.1). Differentially expressed genes with  $\text{adj.P.Val} < 0.05$  and  $\text{logFC} > 2$  were selected as  
641 protoplast-induced genes.

642

643 **Single Cell Transcriptome Analysis.** FASTQ files were mapped using cellranger (10X  
644 Genomics). Reads were aligned to the tomato genome (SL4.0) with the ITAG4.1 gene annotation  
645 file. Organellar (mitochondria and plastid) sequences and gene annotation were appended to the  
646 main genome and annotation files. Protoplasting-induced (**Supplemental Table 2**) genes were  
647 removed. Genes with counts in 3 cells or less were also removed. Low quality cells that contained  
648 less than 500 unique molecular identifiers (UMIs) were filtered out. Additionally, cells with >1%  
649 UMI counts belonging to organelle genes were filtered out. Data was then normalized using  
650 Seurat (v4.0.5) (Satija et al., 2015), followed by principal component analysis (PCA) and non-  
651 linear dimensionality reduction using UMAP. Fifty principal components were calculated and  
652 UMAP embedding was generated using the initial 35 principal components. Cluster-enriched  
653 genes were computed using the "FindAllMarkers" function in Seurat using the only.pos = TRUE,  
654 min.pct = 0.1, logfc.threshold = 0.25 parameters.

655  
656 **Single cell cluster annotation.** The clusters were annotated based on the overlap of cluster  
657 marker genes and a set of cell type-enriched marker genes from (Kajala et al., 2021). Given a set  
658 of tissue specific markers for T number of tissue types we call these sets  $M_i$  ( $i=1...A$ ), with  $M_i =$   
659  $\{m_{i1}, m_{i2}... m_{in}\}$ ,  $m_{ij}$  representing genes in the cell type-enriched marker list. These tissue specific  
660 markers are mutually exclusive such that no genes appear in two different sets ( $M_{ij} \cap M_{km}$  for any  
661  $i, k$ ). We first identified the marker genes from Seurat-generated cluster markers  $S_i = \{s_{i1}, s_{i2}, \dots$   
662  $s_{in}\}$ , ( $i=1...C$ ), where C equals the number of Seurat generated clusters. We generated an  
663 overlapping table between  $M_i$  markers and  $S_i$  markers which we represent in the table as  $T_{ij}$   
664 ( $i=1...T, j=1...C$ ). For each Seurat cluster, we hypothesize that the cells with the highest number  
665 of overlapping markers  $T_{ij}$  is the cell type of this cluster. A chi-squared test was used to determine  
666 the statistical significance of the marker overlap using the following formula:

$$667 \chi^2 = \sum \frac{(O_i - E_i)^2}{E_i^2}$$

668 With  $i=1,2$  and

669  $O_1 =$  number of highest overlapping markers  $\text{argmax}(i)T_{ij}$

670  $E_1 =$  expected number of overlapping markers  $\text{sum}(T_{ij})/N$ ,  $N =$  number of tissue types.

671  $O_2 =$  sum of markers that overlap with all other clusters  $\text{sum}(T_{ij}) - i^{\text{max}}$

672  $E_2 =$  expected number of markers that overlap with all other clusters

673 A Bonferroni-corrected p value was used to select significant marker overlaps. This process was  
674 repeated for the second highest and third highest overlapping markers until the corrected p value  
675 is higher than 0.01. An individual cluster was assigned the annotation of the tissue types that had

676 the most genes overlapping between the two marker sets, provided the adjusted p value was  
677 significant for the overlap.

678

679 **Trajectory Analysis of Exodermis Cell types.** A trajectory analysis was run for the ground  
680 tissue cells (likely exodermis, cortex and endodermal cells derived from the cortex-endodermis  
681 initial (Ron et al., 2013) cells after selecting and re-clustering the cell types annotated as  
682 exodermis and meristematic zone (clusters 0, 3, 8, 11, 12, 14, 15, 23, 25, 28). Trajectory analysis  
683 was performed using dynverse (Saelens et al., 2019) and tidyverse in R. Gene expression  
684 matrices, dimensionality reduction and clustering were imported into the dynverse wrapper from  
685 Seurat and a starting cell was decided within the meristematic zone cluster and trajectory  
686 inference was run using the minimum spanning tree (MST) algorithm. The MST method and  
687 UMAP co-ordinates from Seurat were used as input for mclust (Scrucca et al., 2016) in R.  
688 Predictive genes or genes that were differentially expressed along the trajectory, specific  
689 branches and milestones were identified and visualized with a heatmap using dynfeature within  
690 the R package dynverse.

691

692 **Histochemical Analysis.** Root suberin was observed after Fluorol Yellow (FY) staining as  
693 described in (Lux et al., 2005). For sections, roots were divided in 1 cm segments, embedded in  
694 4% agarose, and sliced in 120  $\mu$ m sections using a vibratome. Sections were then incubated in  
695 FY088 (0.01%w/v, dissolved in lactic acid) for 1 hour at RT in darkness, rinsed three times with  
696 water, and counterstained with aniline blue (0.5% w/v, dissolved in water) for 1 hour at RT in  
697 darkness. Confocal Laser Scanning microscopy was performed on a Zeiss Observer Z1 confocal  
698 with the 20X objective and GFP filter (488nm excitation, 500-550nm emission). For whole roots,  
699 suberin was observed in seven-day-old *S. lycopersicum* wild type or mutant seedlings. Whole  
700 roots were incubated in methanol for 3 days, changing the methanol daily. Once cleared, roots  
701 were incubated in Fluorol Yellow 088 (0.05%w/v, dissolved in methanol) for 1 hour at room  
702 temperature in the dark, rinsed three times with methanol, and counterstained with aniline blue  
703 (0.5% w/v, dissolved in methanol) for 1 hour at room temperature in the dark. Roots were mounted  
704 and observed with the EVOS cell imaging system (ThermoFisher) using the GFP filter (488nm  
705 excitation, 500-550nm emission). Root sections were also stained with basic fuchsin (Fisher  
706 scientific Cat no 632-99-5). 1 cm segments from the root tip were embedded in 3% agarose and  
707 were sectioned at 150-200  $\mu$ M using a vibratome (Leica VT1000 S). The sections were stained  
708 in Clearsee buffer (Ursache et al. 2018) with basic fuchsin for 30 minutes and then washed two

709 times. Confocal Laser Scanning microscopy was performed on a Zeiss LSM700 confocal with the  
710 20X objective, basic fuchsin: 550-561 nm excitation and 570-650 nm detection.

711  
712 **Suberin Monomer Analysis.** Four biological replicates were analyzed for each genotype. An  
713 average of 80 mg fresh weight root tissue per biological replicate was washed and immediately  
714 placed in a 2:1 solution of chloroform:methanol. Subsequently, root samples were extracted in a  
715 Soxhlet extractor for 8 h, first with  $\text{CHCl}_3$ , afterwards with methanol to remove all soluble lipids.  
716 The delipidated tissues were dried in a desiccator over silica gel and weighed. Suberin monomers  
717 were released using boron trifluoride in methanol at 70°C overnight. Dotriacontane was added to  
718 each sample at a concentration of  $0.2 \mu\text{g } \mu\text{l}^{-1}$  as an internal standard, saturated  $\text{NaHCO}_3$  was  
719 used to stop the transesterification reaction, and monomers were extracted with  $\text{CHCl}_3$ . The  
720  $\text{CHCl}_3$  fraction was washed with water, and residual water removed using  $\text{Na}_2\text{SO}_4$ . The  $\text{CHCl}_3$   
721 fraction was then concentrated down to  $\sim 50 \mu\text{l}$ , and derivatized with N,N-bis-  
722 trimethylsilyltrifluoroacetamide (BSTFA) and pyridine at 70°C for 40 minutes. Compounds were  
723 separated using gas chromatography (GC) and detected using a flame ionization detector (FID;  
724 6890N Network GC System; Agilent Technologies, Santa Clara, CA, USA) basically as described  
725 in (Franke et al., 2005). Compound identification was accomplished using an identical gas  
726 chromatography system paired with a mass spectroscopy selective detector (GC-MS; 5977A  
727 MSD; Agilent Technologies). Compounds were identified by their characteristic fragmentation  
728 spectra pattern with reference to an internal library of common suberin monomers and the NIST  
729 database.

730  
731 **Transmission Electron Microscopy.** Tomato roots were fixed in 2.5% glutaraldehyde solution  
732 (EMS, Hatfield, PA) in phosphate buffer (PB 0.1 M [pH 7.4]) for 1 hour at room temperature and  
733 subsequently fixed in a fresh mixture of osmium tetroxide 1% (EMS) with 1.5% potassium  
734 ferrocyanide (Sigma, St. Louis, MO) in PB buffer for 1 hour at room temperature. The samples  
735 were then washed twice in distilled water and dehydrated in acetone solution (Sigma, St Louis,  
736 MO, US) in a concentration gradient (30% for 40 minutes; 50% for 40 minutes; 70% for 40 min  
737 and 100% for 1 hour 3 times. This was followed by infiltration in LR White resin (EMS, Hatfield,  
738 PA, US) in a concentration gradient (33% LR White 33% in acetone for 6 hours; 66% LR White in  
739 acetone for 6 hours; 100% LR White for 12 hours two times) and finally polymerized for 48 hours  
740 at 60°C in an oven in atmospheric nitrogen. Ultrathin sections (50 nm) were cut transversely at 2,  
741 5 and 8 mm from the root tip, the middle of the root and 1 mm below the hypocotyl-root junction,  
742 using a Leica Ultracut UC7 (Leica Mikrosysteme GmbH, Vienna, Austria), picked up on a copper



743 slot grid 2x1mm (EMS, Hatfield, PA, US) and coated with a polystyrene film (Sigma, St Louis,  
744 MO, US). Micrographs and panoramic images were taken with a transmission electron  
745 microscope FEI CM100 (FEI, Eindhoven, The Netherlands) at an acceleration voltage of 80kV  
746 with a TVIPS TemCamF416 digital camera (TVIPS GmbH, Gauting, Germany) using the software  
747 EM-MENU 4.0 (TVIPS GmbH, Gauting, Germany). Panoramic images were aligned with the  
748 software IMOD (Kremer et al, 1996)(Kremer et al., 1996).

749

750 **Phylogenetic tree construction.** Phylogenetic trees were generated using the methods  
751 described in (Kajala et al., 2021). Blastp (Madden, 2003) was used to identify homologous  
752 sequences from forty-two proteomes with options “-max\_target\_seqs 15 -evalue 10E-6 -  
753 qcov\_hsp\_perc 0.5 -outfmt 6”. A multiple sequence alignment was generated with MAFFT v7  
754 (option-auto) (Kato and Standley, 2013), trimmed with trimal (Capella-Gutierrez et al., 2009) with  
755 the setting “-gappypout” and a draft tree generated with FastTree (Price et al., 2010). Tree  
756 construction methodology was informed by (Rokas, 2011). To generate a maximal likelihood  
757 phylogenetic tree, RAxML was used with the option -m PROTGAMMAAUTO and bootstrapped  
758 100 times. Edges with less than 25% bootstrapped support were collapsed using  
759 TreeCollapserCL4 (<http://emmahodcroft.com/TreeCollapseCL.html>).

760 **SUPPLEMENTAL FIGURE LEGENDS**

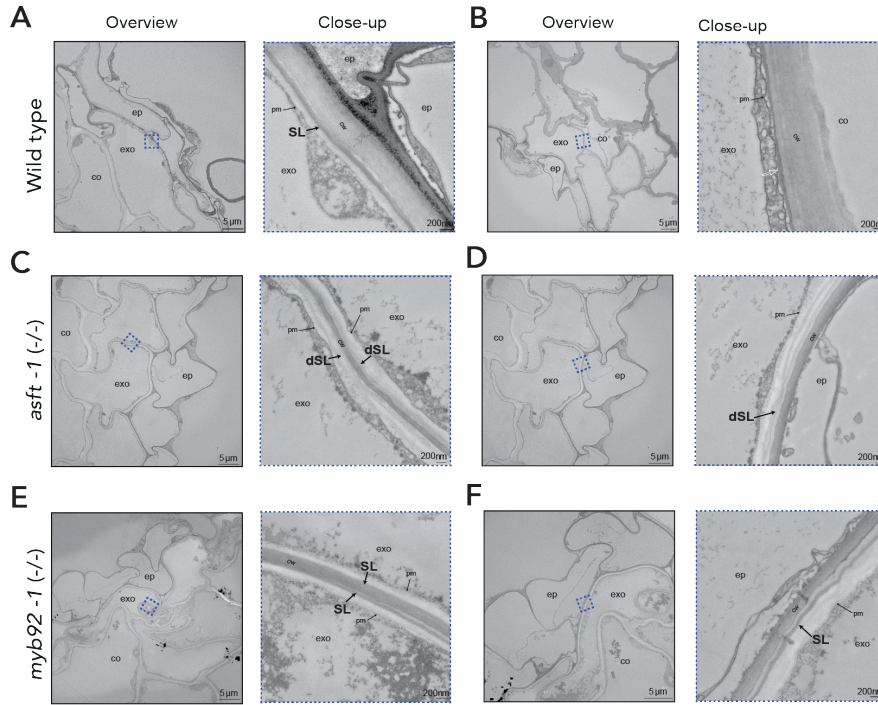

761  
762 **Figure S1. Suberin deposition and ultra-structure in tomato exodermal cells.** Transmission electron microscopy  
763 cross-sections of 7-day-old wild type, *asft-1* and *myb92-1* plants obtained at 1 mm from the root-hypocotyl junction.  
764 Overview shows the epidermal, exodermal and inner cortex layers. Close-up (zone defined with blue dashed lines)  
765 shows the presence or absence of suberin lamellae. Black arrows indicate the presence of suberin lamellae, white  
766 arrow indicates areas where suberin lamellae could not be detected. scale bars = 5 μm for overview and 200nm for  
767 close-up. Close-ups of C & E are repeated in Figure 3. co = cortex, exo = exodermis, ep = epidermis, SL = suberin  
768 lamellae, dSL = defective suberin lamellae, cw = cell wall, pm = plasma membrane.

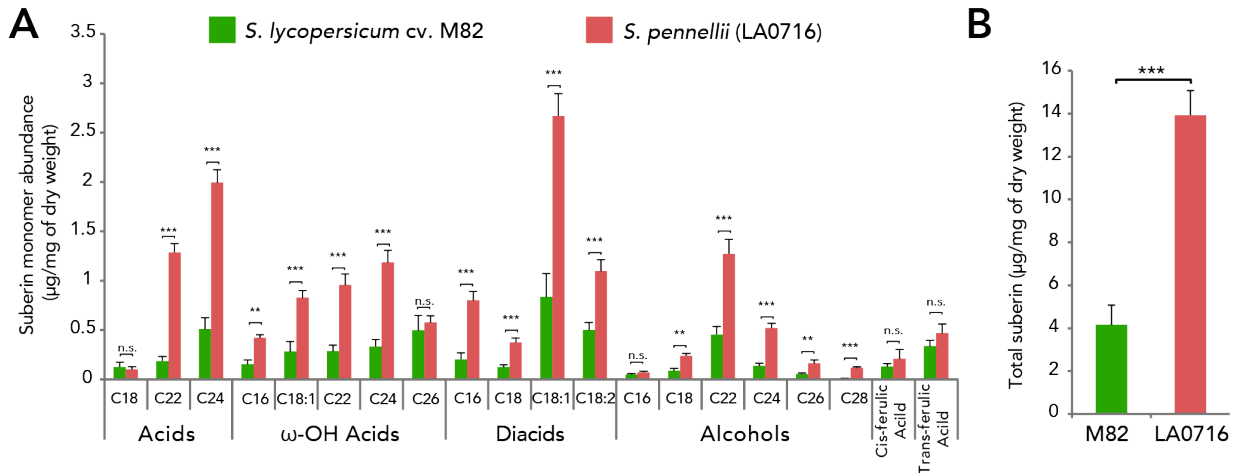

769  
770 **Figure S2. Roots of tomato wild relative *Solanum pennellii* (LA0716) contain significantly more suberin than**  
771 ***Solanum lycopersicum* (cv. M82).** (A) Breakdown by monomer abundance. Plants were grown in MS plates and  
772 collected 7 days after sowing (n = 5, Methods). Acid: fatty acids; Alcohols: primary alcohols; ω-OH: ω-hydroxy fatty

773 acids; DCA: dicarboxylic fatty acid; Aromatics: ferulate and coumarate derivatives. Signif. codes: '\*\*\*\*' <0.001 '\*\*\*' <0.01,  
774 n.s.: "not significant". (B) Total abundance of suberin expressed as  $\mu\text{g mg}^{-1}$  of total dry weight.

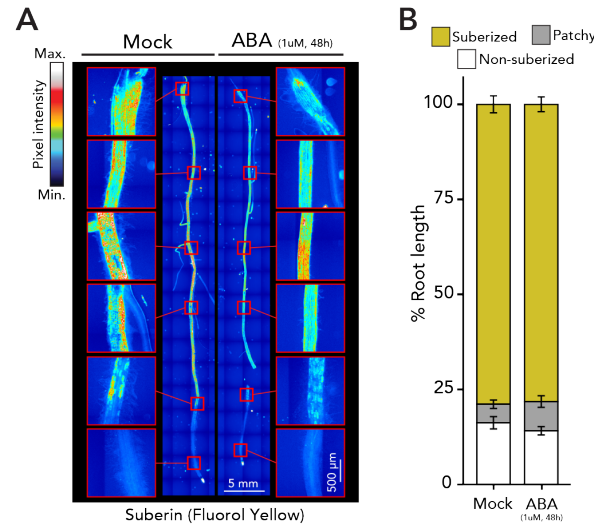

775  
776 **Figure S3. Suberin levels remain unchanged in response to 1  $\mu\text{M}$  ABA in *Solanum pennellii*.** (A) Fluorol yellow  
777 staining for suberin in tomato wild relative *S. pennellii* (LA0716) 7-day-old plants treated with mock or 1  $\mu\text{M}$  ABA for 48  
778 h. Whole-mount staining of primary roots. (B) Developmental stages of suberin deposition of plants treated with mock  
779 or 1  $\mu\text{M}$  ABA for 48 h. Zones were classified in non-suberized (white), patchy suberized (gray) and continuously  
780 suberized (yellow), n = 7, error bars: SD.

781

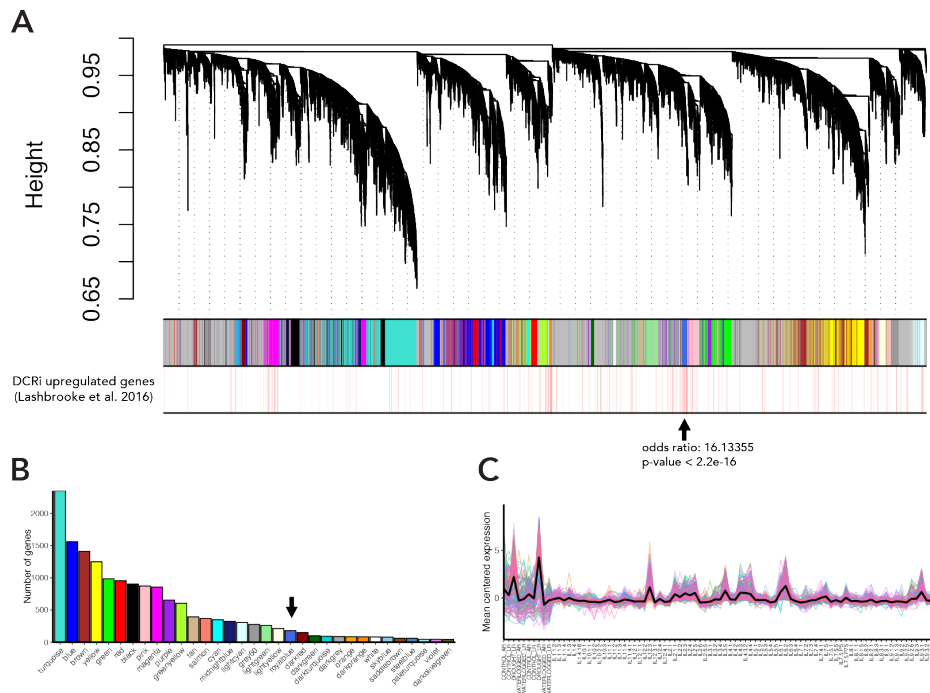

782  
783 **Figure S4. WGCNA analysis of drought and IL datasets identifies a module enriched in suberin-related genes.**  
784 (A) Gene dendrogram obtained by average linkage hierarchical clustering. The different colors underneath the  
785 dendrogram show module assignment as determined by the Dynamic Tree Cut. The bottom panel highlights (marked

786 as thin red lines) the genes identified as upregulated in the suberin overexpression line DCRi in Lashbrooke et al.  
 787 2016. The “royal blue” (black arrow) module was significantly enriched for DCRi-upregulated genes. (B) Sizes of all  
 788 gene modules identified in the analysis. The “royal blue” module (black arrow) contained 180 genes. (C) Mean centred  
 789 gene expression of all the members of the “royal blue” module. Peaks in expression can be found in drought samples,  
 790 in *Solanum pennellii* and in certain introgression lines.

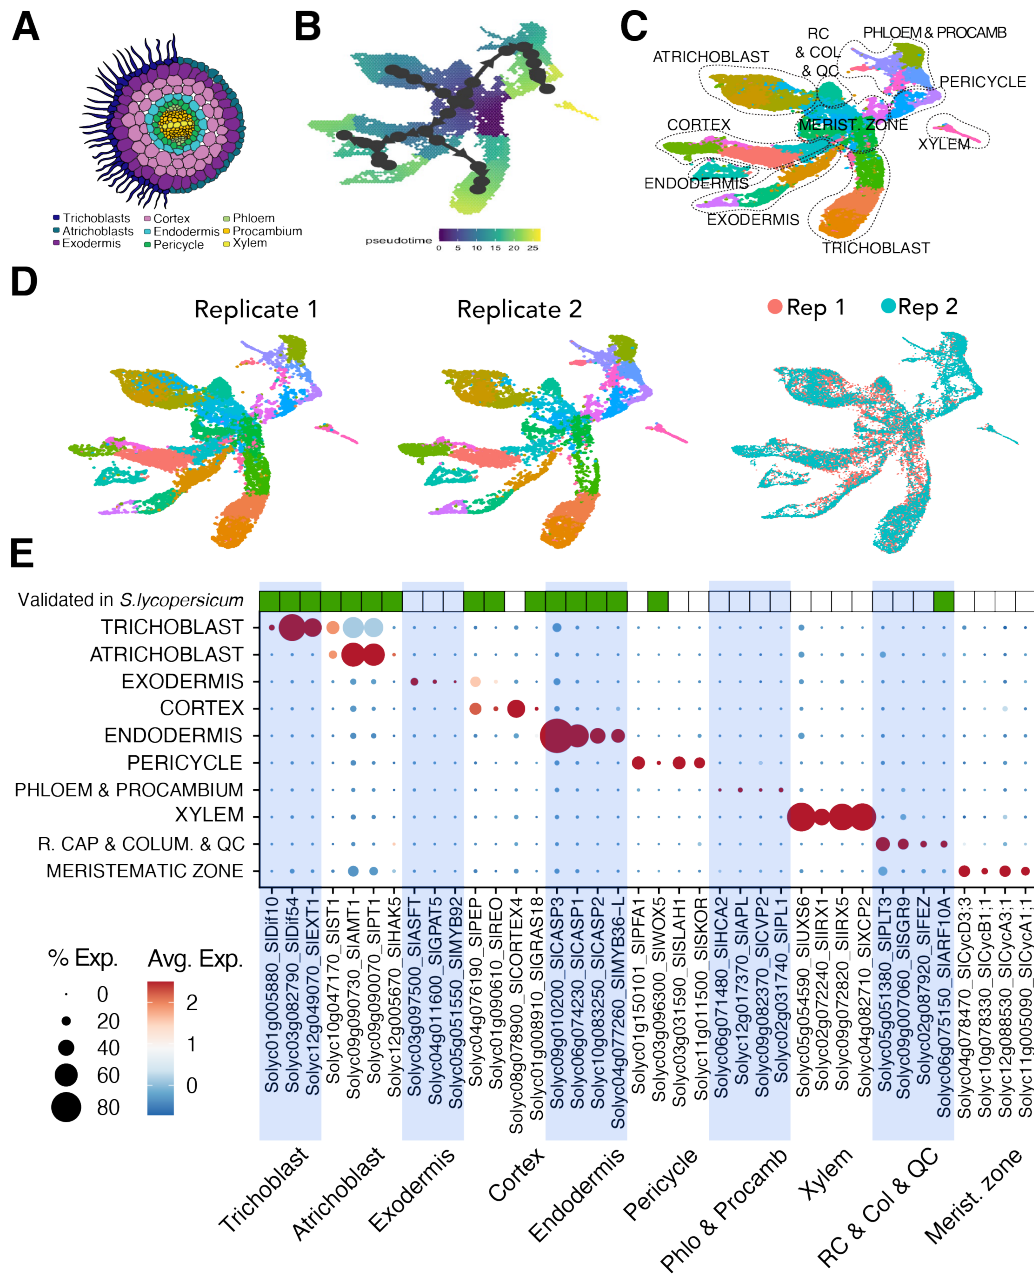

791 **Figure S5. Single cell transcriptome atlas of the tomato root.** (A) Graphical depiction of a tomato root section with  
 792 cell types profiled in the single cell population. (B) A pseudo-time trajectory analysis ran on the population. (C)  
 793 Annotation of single cell clusters displayed by an integrated uniform manifold approximation and projection (UMAP).  
 794 Circles indicate subpopulations clustered together. (D) Reproducibility of biological replicates as observed by UMAP  
 795 and cluster identification. (E) Expression profiles for 39 genes expressed across the major root tissue types. Dot

797 diameter represents the percentage of cells in which each gene is expressed (% Exp.); and colors indicate the average  
 798 scaled expression of each gene in each developmental stage group with warmer colors indicating higher expression  
 799 levels. Top row indicates whether the gene's expression has been validated in *S. lycopersicum* previously published  
 800 work. R.C.: Root cap. Q.C.: Quiescent center. Col: Columella. Procamb: Procambium. Phlo: Phloem.

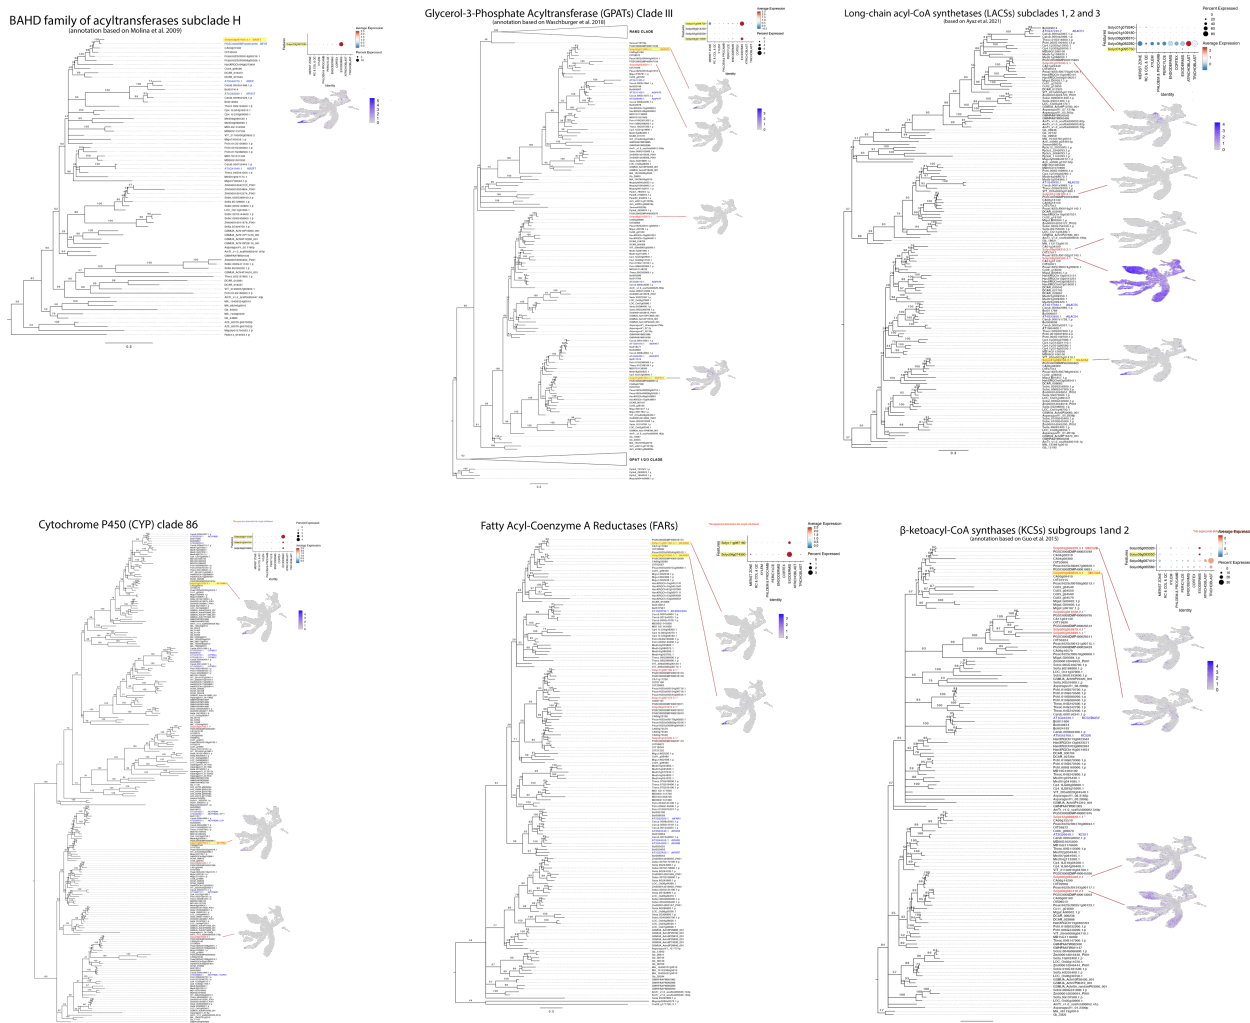

801  
 802 **Figure S6. Phylogenetic tree and single cell expression of potential suberin biosynthesis genes.** (Left)  
 803 Phylogenetic trees generated using protein sequences of several plant species. *S. lycopersicum* genes are highlighted  
 804 in red. *A. thaliana* genes are highlighted in blue for reference. AmTr: *Amborella trichopoda*, AT: *Arabidopsis thaliana*,  
 805 Asparagus: *Asparagus officinalis*, Azfi: *Azolla filiculoides*, Bol: *Brassica oleracea*, Carub: *Capsella rubella*, CA:  
 806 *Capsicum annuum*, Cc: *Coffea canephora*, Cp: *Cucurbita pepo*, DCAR: *Daucus carota*, Gb: *Ginkgo biloba*, HanXRQ:  
 807 *Helianthus annuus*, MD: *Malus domestica*, Mapoly: *Marchantia polymorpha*, Medtr: *Medicago truncatula*, Migut:  
 808 *Mimulus guttatus*, GSMUA: *Musa acuminata*, OIT: *Nicotiana attenuata*, GWHPAAYW: *Nymphaea colorata*, LOC\_Os:  
 809 *Oryza sativa japonica*, Peaxi: *Petunia axillaris*, Pp: *Physcomitrella patens*, MA: *Picea abies*, Potri: *Populus trichocarpa*,  
 810 Semoe: *Selaginella moellendorffii*, Seita: *Setaria italica*, Solyc: *Solanum lycopersicum*, PGSC: *Solanum tuberosum*,  
 811 Sobic: *Sorghum bicolor*, Thecc: *Theobroma cacao*, VIT: *Vitis vinifera*, Zm: *Zea mays*. (Right Top) Expression profiles  
 812 for genes of the suberin biosynthetic pathway. Dot sizes represent the percentage of cells in which each gene is  
 813 expressed (% Exp.); and colors indicate the average scaled expression of each gene in each developmental stage

814 group with warmer colors indicating higher expression levels. R.C.: Root cap. Q.C.: Quiescent center. Col: Columella.  
 815 Procamb: Procambium. (Right bottom) Expression of *S. lycopersicum* genes in the single cell population. The color  
 816 scale represents log<sub>2</sub>-normalized corrected UMI counts.

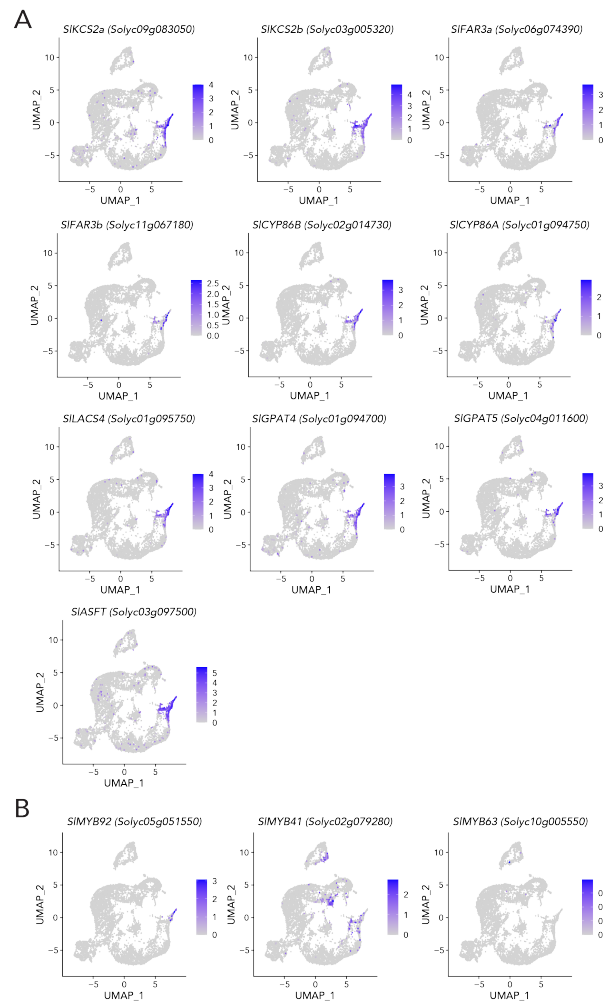

817  
 818 **Figure S7. Expression of suberin biosynthetic genes and SIMYB92 is restricted to the mature exodermis.**  
 819 Expression of candidate (A) biosynthetic genes and (B) transcriptional regulators across the UMAP of  
 820 Endodermis/Exodermis/Cortex single cell populations. The color scales represent log<sub>2</sub>-normalized corrected UMI  
 821 counts.

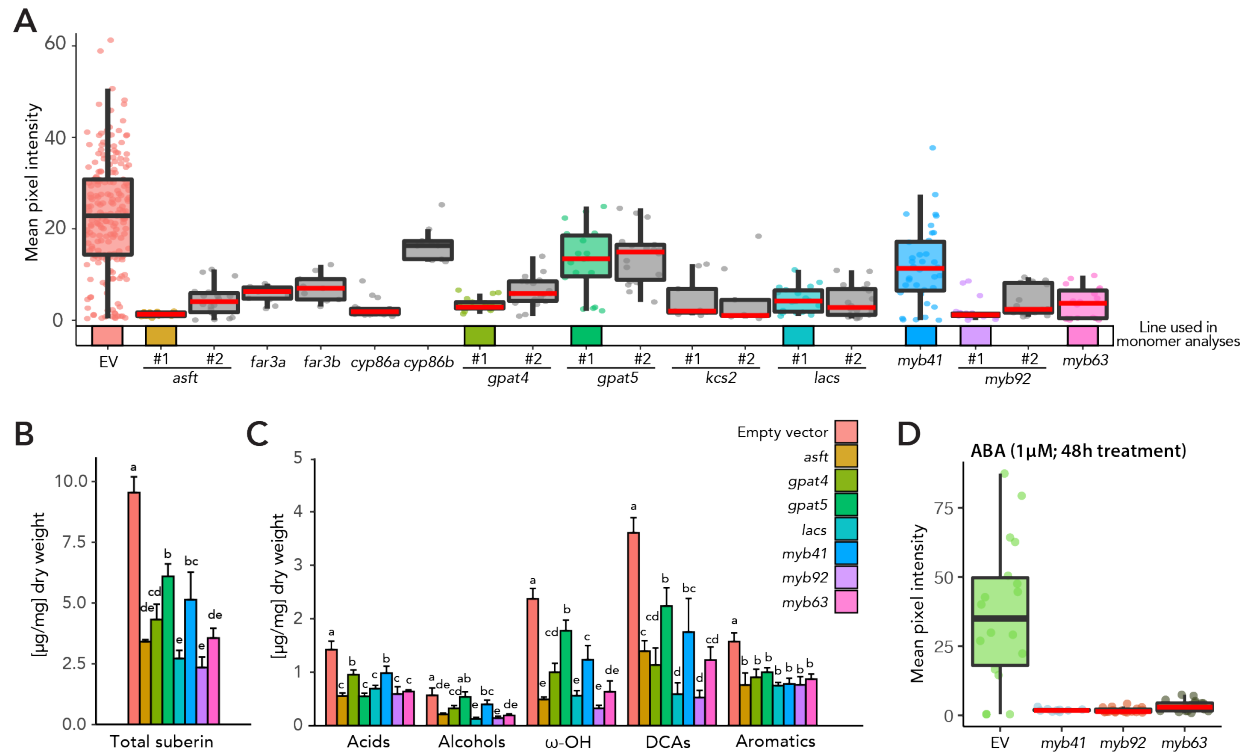

822  
823  
824  
825  
826  
827  
828  
829  
830  
831  
832

**Figure S8. *R. rhizogenes*-derived loss-of-function mutant alleles of candidate genes have impaired suberin deposition.** (A) Extended analysis of mutant phenotypes of candidate genes in hairy roots (HR). Quantification of fluoro yellow signal across multiple cross sections ( $n \geq 6$ ). Red line indicates statistically significant differences in fluoro yellow pixel intensity in the mutant vs wild type as determined with a one-way ANOVA followed by a Tukey HSD test (adj  $p$ -value  $< 0.05$ ). In most cases, two independently generated HR lines were analyzed, as indicated in the plot. (B) Total suberin abundance and (C) monomer composition of *R. rhizogenes*-generated mutants of suberin biosynthetic enzymes and transcriptional regulators. Acid: fatty acids; Alcohols: primary alcohols;  $\omega$ -OH:  $\omega$ -hydroxy fatty acids; DCA: dicarboxylic fatty acid; Aromatics: ferulate and coumarate derivatives. (D) ABA treatment ( $1\mu\text{M}$  for 48 h) does not restore suberin to wild type levels by fluoro yellow staining in *slmyb41*, *slmyb92* and *slmyb63* lines. Mean pixel intensities are not comparable between plots A and D as these were taken under different laser settings.

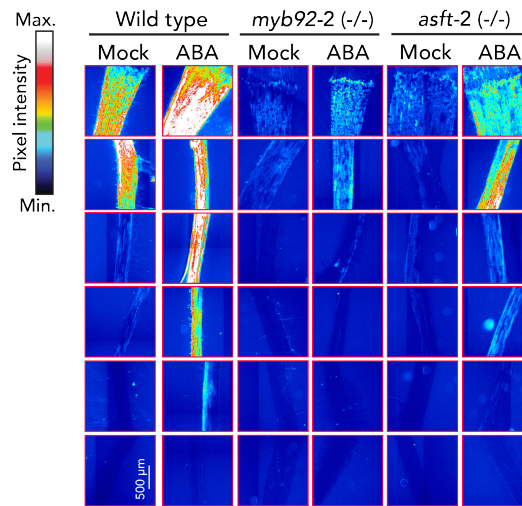

833  
834 **Figure S9: Impaired suberin deposition in the *myb92-2* and *asft-2* alleles and their impact on the response to**  
835 **ABA.** Fluorol Yellow (FY) staining for suberin in wild type (repeated from figure 1 for reference), *myb92-2* and *asft-2*  
836 plants treated with mock or 1 μM ABA.

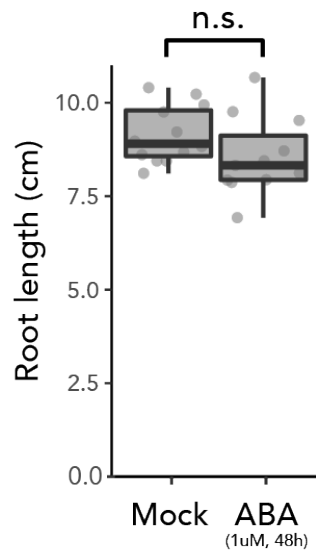

837  
838 **Figure S10: Root length is not significantly affected by the ABA treatment.** Boxplot of total root length of 7-day-  
839 old wild-type plants treated with mock or 1 μM ABA for 48 h (n=12). A one-way ANOVA analysis did not find any  
840 statistically significant differences.



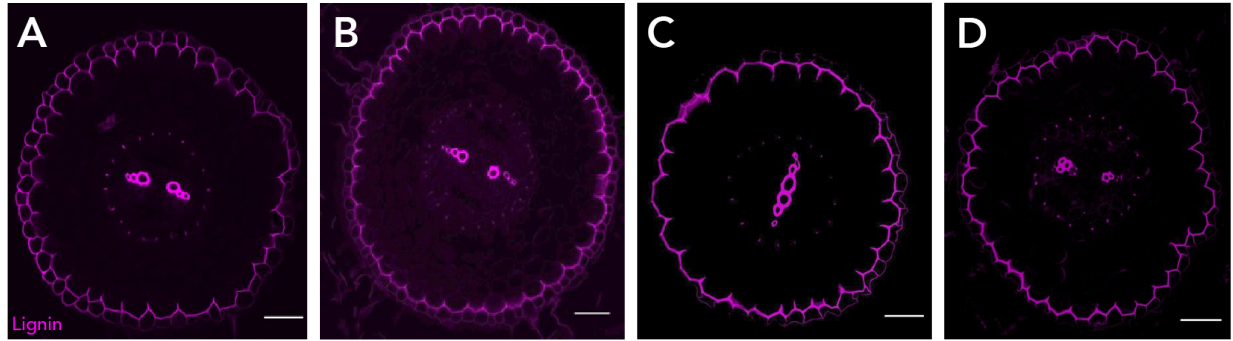

841  
842 **Figure S11. Lignin polar cap in the exodermis is not affected in the *myb41 myb63* and *myb92* hairy root**  
843 **mutants. A.** Cross section of control hairy root stained with basic fuchsin. **B.** Cross section of *myb92* hairy root mutant  
844 stained with basic fuchsin. **C.** Cross section of *myb63* hairy root mutant stained with basic fuchsin. **D.** Cross section of  
845 *myb41* hairy root mutant stained with basic fuchsin. Scale bars=50 μm.

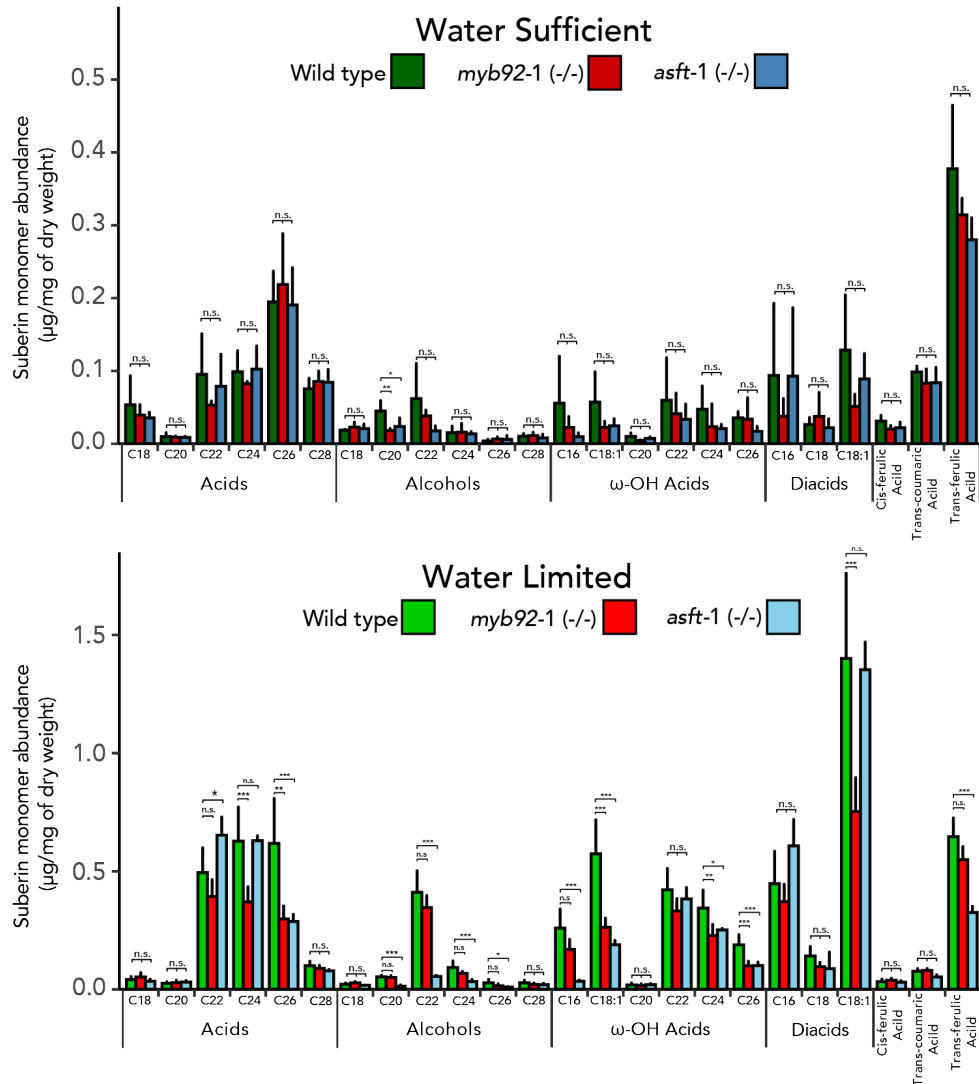

846  
847 **Figure S12: Suberin monomer breakdown of wild type, *myb92-1*, and *asft-1*.** Breakdown of specific monomer  
848 abundance of samples under water sufficient (top) and water limited conditions (bottom). Acid: fatty acids; Alcohols:

849 primary alcohols;  $\omega$ -OH:  $\omega$ -hydroxy fatty acids; DCA: dicarboxylic fatty acid; Aromatics: ferulate and coumarate  
850 derivatives. Significance codes: '\*\*\*\*' <0.001 '\*\*\*' <0.01, n.s.: "not significant".

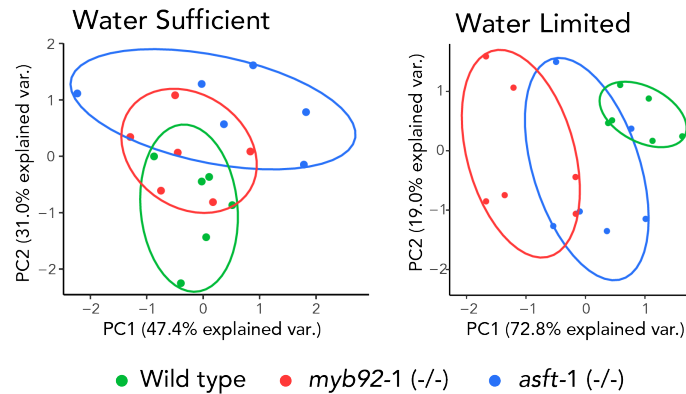

851  
852 **Figure S13: Different overall responses to water limitation in *slasft-1* and *slmyb92-1* compared to wild type.**  
853 Principal Component (PC) analysis of physiological traits of plants grown in water sufficient, and water limited  
854 conditions. Each sample is indicated by a dot and colored by the genotype (n=6).

855

856

## 857 SUPPLEMENTARY TABLES

858

859 **Table S1:** Canonical suberin biosynthesis enzymes and transcriptional regulators identified in the  
860 'royal blue' module. Genes upregulated in fruit that are related to suberin deposition in a DCRi  
861 mutant (Lashbrooke et al., 2016).

862

863 **Table S2:** Tomato root protoplasting-induced genes.

864

865 **Table S3:** Genes activated in the mature exodermal developmental trajectory in the single cell  
866 transcriptome data.

867

868 **Table S4:** CRISPR design and mutant description. (A) Allele description for *myb92-1*, *myb92-2*,  
869 *asft-1* and *asft-2*. (B) CRISPR summary of small guide RNA sequences that target PAM sites  
870 chosen for this study.

871

872 **Table S5:** Oligo sequences used in this study.

873

## 874 AUTHOR CONTRIBUTIONS

875 Loosely based on CRediT author statement:

876 **1.- Conceptualization:** ACP; KK (BSynth candidates); LSM (physiology); SG (initial metabolite);  
877 CM (TF candidates and lignin assay); NN (BSynth candidates); DAW (Drought for WGCNA); KAS  
878 (physiology); NS (LICOR); JBS (ABA); NG (Substructure); SL (cluster ID); RBF (suberin comp);  
879 SMB.

880 **2.- Methodology:** ACP; PT; SL; RBF; SMB.

881 **3.- Investigation:** ACP; KK (Figure S4); LSM (Figure 4, S13); CM (Figure S11); DdB (Figure 1,  
882 3, S1); SG (Figure S2); JH (Figure 4, Figure S12); HY (Figure S3, S9, S10); SM (Figure 3, S8);  
883 KS (Figure S8); RU (Figure 1, 3, S1); DAW (Figure S4); RBF (Figure 4, S2, S8, S12).

884 **4.- Computational investigation:** ACP; PT.

885 **5.- Formal Analysis:** ACP; PT; SL; SMB.

886 **6.- Resources (Constructs):** ACP; KK (design Biosynth CRISPR); LSM (design CRISPR); CM  
887 (TF HRs); NN (design Biosynth CRISPR); GAM (CRISPR screen); MM (CRISPR screen).

888 **7.- Writing - original draft:** ACP; KK, DdB; NG; SL; RBF; SMB.

889 **8.- Visualization/Figures:** ACP; PT; DdB; CM.

890 **9.- Supervision:** ACP; KK; AB; KAS; NS; NG; SL; RBF; SMB.

891 **10.- Editing:** All authors contributed to the edition of the manuscript.

892

## 893 **ACKNOWLEDGMENTS**

894 We would like to thank A.M. Bagman and K. Zumstein for experimental assistance; C. Bian, K.  
895 Morimoto, and T. Taylor for discussion; D. Kawa and G. Demirer for manuscript critique. Funding  
896 was as follows: ACP, SMB, NS, JBS by NSF PGRP IOS-1856749 and IOS-211980. SMB by  
897 HHMI 55108506. KK by SKR Postdoctoral Fellowship and MSCA RI Fellowship 790057. LSM by  
898 BARD FI-570-2018 and HFSP #RGP0067. CM by MSCA GF 655406. PT and SL by DOE DE-  
899 SC0020358 and NSF MCB-2218234. DAW by Elsie J. Stocking Fellowship PBD-UCD. SL by  
900 USDA-HATCH program. RU by EMBO ALTF 1046-2015. GAM by NSF PRFB IOS-1907008. ATB  
901 and JBS by NSF DGE-1922642. ATB by USDA NIFA 1026477.

902

## 903 **DATA AND RESOURCE AVAILABILITY**

904 Single-cell and bulk RNA-seq data have been deposited at GEO: GSE212405 and will be publicly  
905 available at the date of publication. CRISPR-generated mutant lines are available upon request.  
906 Timing is dependent upon obtaining phytosanitary certificates according to seed import  
907 regulations of the country of destination and associated costs.

908

## 909 **REFERENCES**

- 910 Barberon, M. (2017). The endodermis as a checkpoint for nutrients. *New Phytol.* 213, 1604–  
911 1610. .
- 912 Barberon, M., Vermeer, J.E.M., De Bellis, D., Wang, P., Naseer, S., Andersen, T.G., Humbel,  
913 B.M., Nawrath, C., Takano, J., Salt, D.E., et al. (2016). Adaptation of Root Function by Nutrient-  
914 Induced Plasticity of Endodermal Differentiation. *Cell* 164, 447–459. .
- 915 Baxter, I., Hosmani, P.S., Rus, A., Lahner, B., Borevitz, J.O., Muthukumar, B., Mickelbart, M.V.,  
916 Schreiber, L., Franke, R.B., and Salt, D.E. (2009). Root suberin forms an extracellular barrier  
917 that affects water relations and mineral nutrition in Arabidopsis. *PLoS Genet.* 5, e1000492. .
- 918 Beisson, F., Li, Y., Bonaventure, G., Pollard, M., and Ohlrogge, J.B. (2007). The acyltransferase  
919 GPAT5 is required for the synthesis of suberin in seed coat and root of Arabidopsis. *Plant Cell*  
920 19, 351–368. .
- 921 Bouzroud, S., Gouiaa, S., Hu, N., Bernadac, A., Mila, I., Bendaou, N., Smouni, A., Bouzayen,  
922 M., and Zouine, M. (2018). Auxin Response Factors (ARFs) are potential mediators of auxin  
923 action in tomato response to biotic and abiotic stress (*Solanum lycopersicum*). *PLoS One* 13,  
924 e0193517. .
- 925 Bucher\*, M., Schroeer, B., Willmitzer, L., and Riesmeier, J.W. (1997). Two genes encoding  
926 extensin-like proteins are predominantly expressed in tomato root hair cells. *Plant Mol. Biol.* 35,  
927 497–508. .
- 928 Bucher, M., Brunner, S., Zimmermann, P., Zardi, G.I., Amrhein, N., Willmitzer, L., and  
929 Riesmeier, J.W. (2002). The expression of an extensin-like protein correlates with cellular tip  
930 growth in tomato. *Plant Physiol.* 128, 911–923. .
- 931 Calvo-Polanco, M., Ribeyre, Z., Dauzat, M., Reyt, G., Hidalgo-Shrestha, C., Diehl, P., Frenger,  
932 M., Simonneau, T., Muller, B., Salt, D.E., et al. (2021). Physiological roles of Casparian strips  
933 and suberin in the transport of water and solutes. *New Phytol.* 232, 2295–2307. .
- 934 Capella-Gutierrez, S., Silla-Martinez, J.M., and Gabaldon, T. (2009). trimAl: a tool for automated  
935 alignment trimming in large-scale phylogenetic analyses. *Bioinformatics* 25, 1972–1973.  
936 <https://doi.org/10.1093/bioinformatics/btp348>.
- 937 Cohen, H., Fedyuk, V., Wang, C., Wu, S., and Aharoni, A. (2020). SUBERMAN regulates  
938 developmental suberization of the Arabidopsis root endodermis. *Plant J.* 102, 431–447. .
- 939 Compagnon, V., Diehl, P., Benveniste, I., Meyer, D., Schaller, H., Schreiber, L., Franke, R., and  
940 Pinot, F. (2009). CYP86B1 is required for very long chain omega-hydroxyacid and alpha, omega  
941 -dicarboxylic acid synthesis in root and seed suberin polyester. *Plant Physiol.* 150, 1831–1843. .
- 942 Domergue, F., Vishwanath, S.J., Joubès, J., Ono, J., Lee, J.A., Bourdon, M., Alhattab, R., Lowe,  
943 C., Pascal, S., Lessire, R., et al. (2010). Three Arabidopsis fatty acyl-coenzyme A reductases,  
944 FAR1, FAR4, and FAR5, generate primary fatty alcohols associated with suberin deposition.  
945 *Plant Physiol.* 153, 1539–1554. .
- 946 Eshed, Y., Abu-Abied, M., Saranga, Y., and Zamir, D. (1992). *Lycopersicon esculentum* lines  
947 containing small overlapping introgressions from *L. pennellii*. *Theor. Appl. Genet.* 83, 1027–  
948 1034. .

- 949 Franke, R., Briesen, I., Wojciechowski, T., Faust, A., Yephremov, A., Nawrath, C., and  
950 Schreiber, L. (2005). Apoplastic polyesters in Arabidopsis surface tissues--a typical suberin and  
951 a particular cutin. *Phytochemistry* 66, 2643–2658. .
- 952 Franke, R., Höfer, R., Briesen, I., Emsermann, M., Efremova, N., Yephremov, A., and Schreiber,  
953 L. (2009). The DAISY gene from Arabidopsis encodes a fatty acid elongase condensing enzyme  
954 involved in the biosynthesis of aliphatic suberin in roots and the chalaza-micropyle region of  
955 seeds. *Plant J.* 57, 80–95. .
- 956 Geldner, N. (2013). The endodermis. *Annu. Rev. Plant Biol.* 64, 531–558. .
- 957 Gibbs, D.J., Voß, U., Harding, S.A., Fannon, J., Moody, L.A., Yamada, E., Swarup, K., Nibau,  
958 C., Bassel, G.W., Choudhary, A., et al. (2014). AtMYB93 is a novel negative regulator of lateral  
959 root development in Arabidopsis. *New Phytol.* 203, 1194–1207. .
- 960 Gómez-Ariza, J., Balestrini, R., Novero, M., and Bonfante, P. (2009). Cell-specific gene  
961 expression of phosphate transporters in mycorrhizal tomato roots. *Biol. Fertil. Soils* 45, 845–  
962 853. .
- 963 Gong, P., Zhang, J., Li, H., Yang, C., Zhang, C., Zhang, X., Khurram, Z., Zhang, Y., Wang, T.,  
964 Fei, Z., et al. (2010). Transcriptional profiles of drought-responsive genes in modulating  
965 transcription signal transduction, and biochemical pathways in tomato. *J. Exp. Bot.* 61, 3563–  
966 3575. .
- 967 Gou, J.-Y., Yu, X.-H., and Liu, C.-J. (2009). A hydroxycinnamoyltransferase responsible for  
968 synthesizing suberin aromatics in Arabidopsis. *Proceedings of the National Academy of  
969 Sciences* 106, 18855–18860. <https://doi.org/10.1073/pnas.0905555106>.
- 970 Gou, M., Hou, G., Yang, H., Zhang, X., Cai, Y., Kai, G., and Liu, C.-J. (2017). The MYB107  
971 Transcription Factor Positively Regulates Suberin Biosynthesis. *Plant Physiol.* 173, 1045–1058.  
972 .
- 973 Gur, A., and Zamir, D. (2004). Unused natural variation can lift yield barriers in plant breeding.  
974 *PLoS Biol.* 2, e245. .
- 975 Gur, A., Semel, Y., Osorio, S., Friedmann, M., Seekh, S., Ghareeb, B., Mohammad, A., Pleban,  
976 T., Gera, G., Fernie, A.R., et al. (2011). Yield quantitative trait loci from wild tomato are  
977 predominately expressed by the shoot. *Theor. Appl. Genet.* 122, 405–420. .
- 978 Höfer, R., Briesen, I., Beck, M., Pinot, F., Schreiber, L., and Franke, R. (2008). The Arabidopsis  
979 cytochrome P450 CYP86A1 encodes a fatty acid  $\omega$ -hydroxylase involved in suberin monomer  
980 biosynthesis. *J. Exp. Bot.* 59, 2347–2360. .
- 981 Holbein, J., Franke, R.B., Marhavý, P., Fujita, S., Górecka, M., Sobczak, M., Geldner, N.,  
982 Schreiber, L., Grundler, F.M.W., and Siddique, S. (2019). Root endodermal barrier system  
983 contributes to defence against plant-parasitic cyst and root-knot nematodes. *Plant J.* 100, 221–  
984 236. .
- 985 Ho-Plágaro, T., Molinero-Rosales, N., Fariña Flores, D., Villena Díaz, M., and García-Garrido,  
986 J.M. (2019). Identification and Expression Analysis of GRAS Transcription Factor Genes  
987 Involved in the Control of Arbuscular Mycorrhizal Development in Tomato. *Front. Plant Sci.* 10,  
988 268. .

- 989 Hosmani, P.S., Kamiya, T., Danku, J., Naseer, S., Geldner, N., Guerinot, M.L., and Salt, D.E.  
990 (2013). Dirigent domain-containing protein is part of the machinery required for formation of the  
991 lignin-based Casparian strip in the root. *Proc. Natl. Acad. Sci. U. S. A.* *110*, 14498–14503. .
- 992 Howarth, J.R., Parmar, S., Barraclough, P.B., and Hawkesford, M.J. (2009). A sulphur  
993 deficiency-induced gene, *sdi1*, involved in the utilization of stored sulphate pools under sulphur-  
994 limiting conditions has potential as a diagnostic indicator of sulphur nutritional status. *Plant*  
995 *Biotechnol. J.* *7*, 200–209. .
- 996 Jones, M.O., Manning, K., Andrews, J., Wright, C., Taylor, I.B., and Thompson, A.J. (2008). The  
997 promoter from SIREO, a highly-expressed, root-specific *Solanum lycopersicum* gene, directs  
998 expression to cortex of mature roots. *Funct. Plant Biol.* *35*, 1224–1233. .
- 999 Kajala, K., Gouran, M., Shaar-Moshe, L., Mason, G.A., Rodriguez-Medina, J., Kawa, D.,  
1000 Pauluzzi, G., Reynoso, M., Canto-Pastor, A., Manzano, C., et al. (2021). Innovation,  
1001 conservation, and repurposing of gene function in root cell type development. *Cell*  
1002 <https://doi.org/10.1016/j.cell.2021.04.024>.
- 1003 Kashyap, A., Jiménez-Jiménez, Á.L., Zhang, W., Capellades, M., Srinivasan, S., Laromaine, A.,  
1004 Serra, O., Figueras, M., Rencoret, J., Gutiérrez, A., et al. (2022). Induced ligno-suberin vascular  
1005 coating and tyramine-derived hydroxycinnamic acid amides restrict *Ralstonia solanacearum*  
1006 colonization in resistant tomato. *New Phytol.* *234*, 1411–1429. .
- 1007 Katoh, K., and Standley, D.M. (2013). MAFFT multiple sequence alignment software version 7:  
1008 improvements in performance and usability. *Mol. Biol. Evol.* *30*, 772–780. .
- 1009 Kolattukudy, P.E., Kronman, K., and Poulouse, A.J. (1975). Determination of structure and  
1010 composition of suberin from the roots of carrot, parsnip, rutabaga, turnip, red beet, and sweet  
1011 potato by combined gas-liquid chromatography and mass spectrometry. *Plant Physiol.* *55*, 567–  
1012 573. .
- 1013 Kosma, D.K., Murmu, J., Razeq, F.M., Santos, P., Bourgault, R., Molina, I., and Rowland, O.  
1014 (2014). AtMYB41 activates ectopic suberin synthesis and assembly in multiple plant species  
1015 and cell types. *Plant J.* *80*, 216–229. .
- 1016 Kremer, J.R., Mastrorade, D.N., and McIntosh, J.R. (1996). Computer visualization of three-  
1017 dimensional image data using IMOD. *J. Struct. Biol.* *116*, 71–76. .
- 1018 Krueger, F. (2012). Trim Galore: a wrapper tool around Cutadapt and FastQC to consistently  
1019 apply quality and adapter trimming to FastQ files, with some extra functionality for MspI-  
1020 digested RRBS-type (Reduced Representation Bisulfite-Seq) libraries. URL [Http://www.](http://www.Bioinformatics.Babraham.Ac.Uk/projects/trim_galore/)  
1021 [Bioinformatics. Babraham. Ac. Uk/projects/trim\\_galore/](http://www.Bioinformatics.Babraham.Ac.Uk/projects/trim_galore/). (Date of Access: 28/04/2016).
- 1022 Langfelder, P., and Horvath, S. (2008). WGCNA: an R package for weighted correlation network  
1023 analysis. *BMC Bioinformatics* *9*, 559. .
- 1024 Lashbrooke, J., Cohen, H., Levy-Samocho, D., Tzfadia, O., Panizel, I., Zeisler, V., Massalha, H.,  
1025 Stern, A., Trainotti, L., Schreiber, L., et al. (2016). MYB107 and MYB9 Homologs Regulate  
1026 Suberin Deposition in Angiosperms. *Plant Cell* *28*, 2097–2116. .
- 1027 Li, P., Yang, M., Chang, J., Wu, J., Zhong, F., Rahman, A., Qin, H., and Wu, S. (2018). Spatial  
1028 Expression and Functional Analysis of Casparian Strip Regulatory Genes in Endodermis

- 1029 Reveals the Conserved Mechanism in Tomato. *Front. Plant Sci.* 9, 832. .
- 1030 Madden, T. (2003). The BLAST sequence analysis tool. *The NCBI Handbook*.
- 1031 McCutchan, H, and Shackel, KA. (1992). Stem-water potential as a sensitive indicator of water  
1032 stress in prune trees (*Prunus domestica* L. cv. French). *Journal of the American Society for*  
1033 *Horticultural Science* 117, 607-611.
- 1034 Molina, I., Li-Beisson, Y., Beisson, F., Ohlrogge, J.B., and Pollard, M. (2009). Identification of an  
1035 *Arabidopsis* feruloyl-coenzyme A transferase required for suberin synthesis. *Plant Physiol.* 151,  
1036 1317–1328. .
- 1037 Naseer, S., Lee, Y., Lapierre, C., Franke, R., Nawrath, C., and Geldner, N. (2012). Casparian  
1038 strip diffusion barrier in *Arabidopsis* is made of a lignin polymer without suberin. *Proc. Natl.*  
1039 *Acad. Sci. U. S. A.* 109, 10101–10106. .
- 1040 Nieves-Cordones, M., Alemán, F., Martínez, V., and Rubio, F. (2010). The *Arabidopsis thaliana*  
1041 HAK5 K<sup>+</sup> transporter is required for plant growth and K<sup>+</sup> acquisition from low K<sup>+</sup> solutions under  
1042 saline conditions. *Mol. Plant* 3, 326–333. .
- 1043 Perumalla, C.J., Peterson, C.A., and Enstone, D.E. (1990). A survey of angiosperm species to  
1044 detect hypodermal Casparian bands. I. Roots with a uniseriate hypodermis and epidermis. *Bot.*  
1045 *J. Linn. Soc.* 103, 93–112. .
- 1046 Pillay, I., and Beyl, C. (1990). Early responses of drought-resistant and-susceptible tomato  
1047 plants subjected to water stress. *J. Plant Growth Regul.* 9, 213–219. .
- 1048 Price, M.N., Dehal, P.S., and Arkin, A.P. (2010). FastTree 2--approximately maximum-likelihood  
1049 trees for large alignments. *PLoS One* 5, e9490. .
- 1050 Reynoso, M.A., Kajala, K., Bajic, M., West, D.A., Pauluzzi, G., Yao, A.I., Hatch, K., Zumstein,  
1051 K., Woodhouse, M., Rodriguez-Medina, J., et al. (2019). Evolutionary flexibility in flooding  
1052 response circuitry in angiosperms. *Science* 365, 1291–1295. .
- 1053 Rokas, A. (2011). Phylogenetic analysis of protein sequence data using the Randomized  
1054 Axelerated Maximum Likelihood (RAXML) Program. *Curr. Protoc. Mol. Biol.* Chapter 19,  
1055 Unit19.11. .
- 1056 Ron, M., Dorrity, M.W., de Lucas, M., Toal, T., Hernandez, R.I., Little, S.A., Maloof, J.N.,  
1057 Kliebenstein, D.J., and Brady, S.M. (2013). Identification of novel loci regulating interspecific  
1058 variation in root morphology and cellular development in tomato. *Plant Physiol.* 162, 755–768. .
- 1059 Ron, M., Kajala, K., Pauluzzi, G., Wang, D., Reynoso, M.A., Zumstein, K., Garcha, J., Winte, S.,  
1060 Masson, H., Inagaki, S., et al. (2014). Hairy root transformation using *Agrobacterium rhizogenes*  
1061 as a tool for exploring cell type-specific gene expression and function using tomato as a model.  
1062 *Plant Physiol.* 166, 455–469. .
- 1063 Saelens, W., Cannoodt, R., Todorov, H., and Saeys, Y. (2019). A comparison of single-cell  
1064 trajectory inference methods. *Nat. Biotechnol.* 37, 547–554. .
- 1065 Salas-González, I., Reyt, G., Flis, P., Custódio, V., Gopaulchan, D., Bakhoun, N., Dew, T.P.,  
1066 Suresh, K., Franke, R.B., Dangl, J.L., et al. (2021). Coordination between microbiota and root  
1067 endodermis supports plant mineral nutrient homeostasis. *Science* 371.

- 1068 <https://doi.org/10.1126/science.abd0695>.
- 1069 Satija, R., Farrell, J.A., Gennert, D., Schier, A.F., and Regev, A. (2015). Spatial reconstruction  
1070 of single-cell gene expression data. *Nat. Biotechnol.* 33, 495–502. .
- 1071 Schreiber, L., Franke, R., Hartmann, K.-D., Ranathunge, K., and Steudle, E. (2005). The  
1072 chemical composition of suberin in apoplastic barriers affects radial hydraulic conductivity  
1073 differently in the roots of rice (*Oryza sativa* L. cv. IR64) and corn (*Zea mays* L. cv. Helix). *J. Exp.*  
1074 *Bot.* 56, 1427–1436. .
- 1075 Scrucca, L., Fop, M., Murphy, T.B., and Raftery, A.E. (2016). mclust 5: Clustering, Classification  
1076 and Density Estimation Using Gaussian Finite Mixture Models. *R J.* 8, 289–317. .
- 1077 Serra, O., and Geldner, N. (2022). The making of suberin. *New Phytol.*  
1078 <https://doi.org/10.1111/nph.18202>.
- 1079 Serra, O., Hohn, C., Franke, R., Prat, S., Molinas, M., and Figueras, M. (2010). A feruloyl  
1080 transferase involved in the biosynthesis of suberin and suberin-associated wax is required for  
1081 maturation and sealing properties of potato periderm. *Plant J.* 62, 277–290. .
- 1082 Shahan, R., Hsu, C.-W., Nolan, T.M., Cole, B.J., Taylor, I.W., Greenstreet, L., Zhang, S.,  
1083 Afanassiev, A., Vlot, A.H.C., Schiebinger, G., et al. (2022). A single-cell Arabidopsis root atlas  
1084 reveals developmental trajectories in wild-type and cell identity mutants. *Dev. Cell*  
1085 <https://doi.org/10.1016/j.devcel.2022.01.008>.
- 1086 Shukla, V., Han, J.-P., Cléard, F., Lefebvre-Legendre, L., Gully, K., Flis, P., Berhin, A.,  
1087 Andersen, T.G., Salt, D.E., Nawrath, C., et al. (2021). Suberin plasticity to developmental and  
1088 exogenous cues is regulated by a set of MYB transcription factors. *Proc. Natl. Acad. Sci. U. S.*  
1089 *A.* 118. <https://doi.org/10.1073/pnas.2101730118>.
- 1090 Steudle, E. (2000). Water uptake by roots: effects of water deficit. *J. Exp. Bot.* 51, 1531–1542. .
- 1091 Thomas, R., Fang, X., Ranathunge, K., Anderson, T.R., Peterson, C.A., and Bernards, M.A.  
1092 (2007). Soybean root suberin: anatomical distribution, chemical composition, and relationship to  
1093 partial resistance to *Phytophthora sojae*. *Plant Physiol.* 144, 299–311. .
- 1094 Thompson, A. (2017). The new plants that could save us from climate change.
- 1095 To, A., Joubès, J., Thueux, J., Kazaz, S., Lepiniec, L., and Baud, S. (2020). AtMYB92 enhances  
1096 fatty acid synthesis and suberin deposition in leaves of *Nicotiana benthamiana*. *Plant J.* 103,  
1097 660–676. .
- 1098 Toal, T.W., Ron, M., Gibson, D., Kajala, K., Splitt, B., Johnson, L.S., Miller, N.D., Slovak, R.,  
1099 Gaudinier, A., Patel, R., et al. (2018). Regulation of Root Angle and Gravitropism. *G3* 8, 3841–  
1100 3855. .
- 1101 Townsley, B.T., Covington, M.F., Ichihashi, Y., Zumstein, K., and Sinha, N.R. (2015). BrAD-seq:  
1102 Breath Adapter Directional sequencing: a streamlined, ultra-simple and fast library preparation  
1103 protocol for strand specific mRNA library construction. *Front. Plant Sci.* 6, 366. .
- 1104 von Wirén, N., Lauter, F.R., Ninnemann, O., Gillissen, B., Walch-Liu, P., Engels, C., Jost, W.,  
1105 and Frommer, W.B. (2000). Differential regulation of three functional ammonium transporter  
1106 genes by nitrogen in root hairs and by light in leaves of tomato. *Plant J.* 21, 167–175. .



1107 Zimmermann, H.M., Hartmann, K., Schreiber, L., and Steudle, E. (2000). Chemical composition  
1108 of apoplastic transport barriers in relation to radial hydraulic conductivity of corn roots (*Zea*  
1109 *mays* L.). *Planta* 210, 302–311. <https://doi.org/10.1007/pl00008138>.
